# Supplementary material for: Impact of dementia education and training on health and social care staff knowledge, attitudes and confidence: a cross-sectional study
Source: PubMed Central journal article supplement — BMJ Open. 2021 Jan 19;11(1):e039939. doi: 10.1136/bmjopen-2020-039939 (PMC7817792; doi:10.1136/bmjopen-2020-039939), 2021-01-19
Supplement: bmjopen-2020-039939.draft_revisions.pdf [file bmjopen-2020-039939.draft_revisions.pdf]

# BMJ Open

BMJ Open is committed to open peer review. As part of this commitment we make the peer review history of every article we publish publicly available.

When an article is published we post the peer reviewers' comments and the authors' responses online. We also post the versions of the paper that were used during peer review. These are the versions that the peer review comments apply to.

The versions of the paper that follow are the versions that were submitted during the peer review process. They are not the versions of record or the final published versions. They should not be cited or distributed as the published version of this manuscript.

BMJ Open is an open access journal and the full, final, typeset and author-corrected version of record of the manuscript is available on our site with no access controls, subscription charges or pay-per-view fees (<http://bmjopen.bmj.com>).

If you have any questions on BMJ Open's open peer review process please email [info.bmjopen@bmj.com](mailto:info.bmjopen@bmj.com)

# BMJ Open

## The impact of dementia education and training on health and social care staff knowledge, attitudes and confidence: A cross-sectional study

|                               |                                                                                                                                                                                                                                                                                                                                                                                                                                                    |
|-------------------------------|----------------------------------------------------------------------------------------------------------------------------------------------------------------------------------------------------------------------------------------------------------------------------------------------------------------------------------------------------------------------------------------------------------------------------------------------------|
| Journal:                      | <i>BMJ Open</i>                                                                                                                                                                                                                                                                                                                                                                                                                                    |
| Manuscript ID                 | bmjopen-2020-039939                                                                                                                                                                                                                                                                                                                                                                                                                                |
| Article Type:                 | Original research                                                                                                                                                                                                                                                                                                                                                                                                                                  |
| Date Submitted by the Author: | 30-Apr-2020                                                                                                                                                                                                                                                                                                                                                                                                                                        |
| Complete List of Authors:     | Parveen , Sahdia; University of Bradford, Smith, Sarah; Leeds Beckett University, School of Health & Community Studies<br>Sass, Cara; Leeds Beckett University<br>Capstick, Andrea; University of Bradford<br>Dennison, Alison; University of Bradford<br>Oyebode, Jan; University of Bradford, School of Dementia Studies<br>Surr, Claire; Leeds Beckett University Faculty of Health and Social Sciences, School of Health and Community Studies |
| Keywords:                     | Dementia < NEUROLOGY, EDUCATION & TRAINING (see Medical Education & Training), GERIATRIC MEDICINE                                                                                                                                                                                                                                                                                                                                                  |
|                               |                                                                                                                                                                                                                                                                                                                                                                                                                                                    |

SCHOLARONE™  
Manuscripts

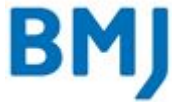

I, the Submitting Author has the right to grant and does grant on behalf of all authors of the Work (as defined in the below author licence), an exclusive licence and/or a non-exclusive licence for contributions from authors who are: i) UK Crown employees; ii) where BMJ has agreed a CC-BY licence shall apply, and/or iii) in accordance with the terms applicable for US Federal Government officers or employees acting as part of their official duties; on a worldwide, perpetual, irrevocable, royalty-free basis to BMJ Publishing Group Ltd ("BMJ") its licensees and where the relevant Journal is co-owned by BMJ to the co-owners of the Journal, to publish the Work in this journal and any other BMJ products and to exploit all rights, as set out in our [licence](#).

The Submitting Author accepts and understands that any supply made under these terms is made by BMJ to the Submitting Author unless you are acting as an employee on behalf of your employer or a postgraduate student of an affiliated institution which is paying any applicable article publishing charge ("APC") for Open Access articles. Where the Submitting Author wishes to make the Work available on an Open Access basis (and intends to pay the relevant APC), the terms of reuse of such Open Access shall be governed by a Creative Commons licence – details of these licences and which [Creative Commons](#) licence will apply to this Work are set out in our licence referred to above.

Other than as permitted in any relevant BMJ Author's Self Archiving Policies, I confirm this Work has not been accepted for publication elsewhere, is not being considered for publication elsewhere and does not duplicate material already published. I confirm all authors consent to publication of this Work and authorise the granting of this licence.

1  
2 TITLE: The impact of dementia education and training on health and social care staff  
3  
4 knowledge, attitudes and confidence: A cross-sectional study  
5  
6  
7

8  
9 AUTHORS: Sahdia Parveen\*, Sarah J Smith, Cara Sass, Jan R Oyebode, Andrea Capstick,  
10  
11 Alison Dennison and Claire A Surr.  
12  
13  
14

15  
16 \*Corresponding author. Dr Sahdia Parveen. Centre for Applied Dementia Studies, University of  
17  
18 Bradford, Richmond Road, Bradford, West Yorkshire, BD7 1DP. Tel: 01274 236089. Email:  
19  
20 [s.parveen27@bradford.ac.uk](mailto:s.parveen27@bradford.ac.uk)  
21  
22  
23

24  
25 Sarah J Smith [s.j.smith@leedsbeckett.ac.uk](mailto:s.j.smith@leedsbeckett.ac.uk)  
26

27  
28 Cara Sass [c.sass@leedsbeckett.ac.uk](mailto:c.sass@leedsbeckett.ac.uk)  
29

30  
31 Jan R Oyebode [j.oyebode@bradford.ac.uk](mailto:j.oyebode@bradford.ac.uk)  
32

33  
34 Andrea Capstick [a.j.capstick@bradford.ac.uk](mailto:a.j.capstick@bradford.ac.uk)  
35

36  
37 Alison Dennison [a.j.capstick@bradford.ac.uk](mailto:a.j.capstick@bradford.ac.uk)  
38

39  
40 Claire A Surr [c.a.surr@bradford.ac.uk](mailto:c.a.surr@bradford.ac.uk)  
41  
42  
43  
44  
45

#### 46 FUNDING STATEMENT:

47  
48 The report is based on independent research commissioned and funded by the NIHR Policy  
49 Research Programme (Understanding Effective Dementia Workforce Education and Training: A  
50 Formative Evaluation (DeWET Evaluation), PR-R10-0514-12006). The funding body had no  
51 role in the design of the study and collection, analysis, and interpretation of data and in writing  
52 the manuscript. The views expressed in the publication are those of the author(s) and not  
53 necessarily those of the NHS, the NIHR, the Department of Health and Social care, 'arms' length  
54 bodies or other government departments.  
55  
56  
57  
58  
59  
60

1  
2 COMPETING INTERESTS STATEMENT: None to declare  
3  
4  
5

6 AUTHOR CONTRIBUTIONS:  
7

8  
9 SP: Co-led the survey work package with SS. SP was involved with study conception, study  
10 design, led data analysis and authored the manuscript.  
11

12  
13 SS: Co-led the survey work package with SP, was involved with study conception, design and  
14 provision of editorial input into the manuscript.  
15

16  
17 CS: CSs developed and disseminated survey materials, contributed to data management and  
18 editorial input into the manuscript.  
19

20  
21 JO contributed to design, data interpretation and provision of editorial input into the manuscript.  
22

23  
24 AC led the involvement of experts by experience, contributed to the design of the study and  
25 provided editorial input into the manuscript.  
26

27  
28 AD is an expert by experience who was involved with all aspects of this study.  
29

30  
31 CAS: Was Chief Investigator and contributed to study conception, design, data interpretation and  
32 provision of editorial input into the manuscript.  
33

34  
35 ACKNOWLEDGMENTS:  
36

37  
38 We would like to acknowledge and thank all the organisations and individuals that supported this  
39 study. We would also like to acknowledge Ms Michelle Drury for supporting survey  
40 dissemination.  
41  
42  
43

44  
45 DATA SHARING STATEMENT: Data may be made available from the authors upon  
46 reasonable request.  
47

48  
49 WORD COUNT = 3721  
50  
51  
52  
53  
54  
55  
56  
57  
58  
59  
60

## ABSTRACT

Objectives: The aim of this study was to establish the impact of dementia education and training on the knowledge, attitudes and confidence of health and social care staff. The study also aimed to identify the most effective features (content and pedagogical) of dementia education and training.

Design: Cross sectional survey study.

Settings: Health and social care staff in the UK including acute care, mental health community care trusts, primary care, and care homes.

Participants: All health and social care staff who had completed dementia education and training meeting the minimal standards as set by Health Education England, within the past five years were invited to participate in an online survey. A total of 668 health and social care staff provided informed consent and completed an online survey, and responses from 553 participants were included in this study. The majority of the respondents were of white British ethnicity (94.4%) and identified as female (88.4%).

Outcomes: Knowledge, attitude and confidence of health and social care staff.

Results: Hierarchical multiple regression analysis was conducted. Staff characteristics, education and training content variables and pedagogical factors were found to account for 18% of the variance in staff knowledge, 22% of variance in attitude (knowledge), 14% of variance in staff comfort (attitude) and 29% of variance in staff confidence. The most effective features of dementia education and training included face to face delivery in combination with simulation based learning or e-learning.

Conclusion: The results suggest that dementia education and training has some limited impact on health and social care staff outcomes. Whilst training content variables were important when

1  
2 attempting to improve staff knowledge, more consideration should be given to pedagogical  
3  
4 factors when training is aiming to improve staff attitude and confidence.  
5

## 6 ARTICLE SUMMARY

### 7 8 9 STRENGTHS AND LIMITATIONS OF THIS STUDY

- 10  
11 • This study explores the impact of a diverse range of dementia education and training  
12 packages.  
13
- 14 • The study explores the impact of pedagogical factors as well as content based variables  
15
- 16 • The sample of health and social care professionals included in this study is not  
17  
18 representative of the dementia care workforce in the UK.  
19
- 20 • The cross-sectional design of the study limits inferences with regards to the impact of  
21  
22 dementia education and training on staff outcomes.  
23  
24  
25  
26

### 27 28 KEY WORDS

29  
30 Dementia; Alzheimer's Disease, Training, Health care, Social care  
31  
32  
33  
34  
35  
36  
37  
38  
39  
40  
41  
42  
43  
44  
45  
46  
47  
48  
49  
50  
51  
52  
53  
54  
55  
56  
57  
58  
59  
60

## BACKGROUND

There are approximately 50 million people living with dementia worldwide and this is set to increase to 75 million by 2030 and 131.5 million by the year 2050. [1] This increase in the number of people living with dementia is primarily thought to be due to improving health care. Better health care has led to an increased life expectancy, therefore there is a greater proportion of older people worldwide. Each year, there are 9.9 million new cases of dementia in the world. The cost of dementia is estimated to be 1 trillion US dollars which is attributed to the cost of informal care, social care and direct medical care. Direct medical care is thought to account for 20% of the global dementia costs and social care accounts for a further 40%. The rising number of people affected by dementia and the increasing cost has led to a number of countries developing national dementia strategies. These strategies include the need for a health and social care workforce that is appropriately trained and skilled to deliver good dementia care.

Within the UK, there are currently 850, 000 people living with dementia, with the cost of care predicted to be £26 billion. [2] Research estimates that in England up to 40% of patients in hospitals are living with dementia [3] and up to 80% of residents in care homes are living with dementia. [4] Inadequate and poor care leads to a reduced quality of life for people living with dementia and a higher overall cost to the NHS, due to avoidable hospital admissions [5] and longer hospital stays. Therefore, a key feature of English National Dementia Strategies [6-8] is the focus upon dementia education and training for the health and social care workforce, in order to deliver good person-centred care. The ‘dementia workforce’ is defined as any individual who may have contact with people living with dementia in health and social care settings from the point of diagnosis to end of life care. The need for a clear evidence base for effective features of dementia education and training for health and social care staff has also been identified.



1  
2 As part of a national programme of work around implementation of quality dementia  
3 education and training, Health Education England developed a Dementia Training Standards  
4 Framework [9] ('The Framework' hereafter). This set the 'gold standard' for training content,  
5 with regard to identifying the knowledge and skills needed to deliver good dementia care. It is  
6 comprised of three Tiers. Tier 1 is 'Dementia Awareness' and is to be completed by all staff  
7 working in any post in health and social care. Staff with regular contact with people with  
8 dementia complete Tier 2 training, and Tier 3 provides advanced skills for leaders in dementia  
9 care. The Framework consists of 14 subjects in total. Each subject comprises of several learning  
10 outcomes that staff are required to accomplish in order to deliver good quality and effective  
11 dementia care. Whilst the Framework provides comprehensive guidance for key content for  
12 dementia education and training, it does not take into account pedagogical considerations of  
13 training.

14  
15  
16  
17  
18  
19  
20  
21  
22  
23  
24  
25  
26  
27  
28  
29  
30 There has been a growing body of research exploring the impact of dementia education  
31 on staff knowledge and skills. Some studies [10-12] have demonstrated that dementia education  
32 and training can improve staff knowledge, confidence, foster positive attitudes and produce  
33 better outcomes for people living with dementia. In contrast, some studies have demonstrated  
34 that dementia training lacks efficacy and has no impact on staff or patient outcomes. [13-15] A  
35 recent review by Surr et al [16] identified 152 studies exploring the impact of dementia  
36 education and training. The findings of this comprehensive review suggest that dementia  
37 education can be efficacious if pedagogical factors are considered. The review suggests that  
38 training and education was found to be most effective if staff considered the training to be  
39 relevant to their role, involved active face to face participation, underpinned practice based  
40 learning with theory, the training was delivered by an experienced facilitator, was at least eight  
41 hours in duration and provided structured guidelines for care practice. The review highlights that

1  
2 the dementia workforce is diverse and has heterogeneous training and education needs. This  
3  
4 makes identifying effective training components highly complex. Previous studies exploring the  
5  
6 impact of dementia education and training have primarily focused on a single training  
7  
8 programme with little focus on pedagogical considerations, and with a select group of health and  
9  
10 social care staff.  
11

12  
13 The aim of this study is to explore the impact of dementia education and training on  
14  
15 health and social care staff in the UK and to identify the most effective features (content and  
16  
17 pedagogical) of dementia training. It aimed to include a diverse range of dementia education and  
18  
19 training packages and staff working across different service settings that provide dementia care.  
20  
21

## 22 METHOD

### 23 *Study design:*

24  
25 This study is a survey based cross-sectional observational study.  
26  
27

### 28 *Setting:*

29  
30 This study was conducted in the UK. Data collection occurred via an online survey completed by  
31  
32 health and social care (working in acute care, community mental health care trust, primary care,  
33  
34 pharmacies and care homes) staff.  
35  
36

### 37 *Procedure:*

38  
39 This study received ethical approval from Leeds Beckett University (Ref 27387). A national  
40  
41 audit of dementia education and training was conducted in 2017 to establish if current training  
42  
43 programmes met the learning outcomes set out by Health Education England's Dementia  
44  
45 Training Standards Framework. The findings of the audit are described by Smith et al [17]. In  
46  
47 total 614 respondents (Care Providers, Training providers and Commissioners) reported on 382  
48  
49 training packages in the national audit, 183 respondents reported one or more packages that met  
50  
51 the criteria for being a package of interest. These 183 respondents were asked to circulate an  
52  
53  
54  
55  
56  
57  
58  
59  
60

1  
2 invite to an online staff survey measuring knowledge, attitudes and confidence, to all participants  
3  
4 that had completed the training package(s) of interest they had reported. The survey was  
5  
6 administered using a web based tool, SNAP (see <https://www.snapsurveys.com/>), which enables  
7  
8 surveys to be individualised, which allowed the names of the specific packages of interest to be  
9  
10 added to the survey distributed by each audit respondent. The survey was promoted by including  
11  
12 university and Health Education England logos on the invite and survey, clearly defined  
13  
14 completion times, follow up emails, and an offer of a prize draw entry.  
15  
16

17  
18 *Participants:*

19  
20 All health and social care staff who had completed one of the training packages of interest in the  
21  
22 past five years and who were still contactable by the audit respondents, were approached to  
23  
24 participate. Survey participants were required to be 18 years or over, and be able to read and  
25  
26 write in English. No other eligibility criteria were applied.  
27  
28

29  
30 *Measures:*

31  
32 The survey comprised of questions concerning:

- 33  
34
- 35 • Staff characteristics (gender, age, ethnicity, length in role, job role).
  - 36  
37 • Reaction to each training course completed, measured on a five-point Likert Scale (one =  
38 strongly disagree to five = strongly agree), with a high score indicating a positive  
39  
40 reaction.  
41  
42  
43  
44
- 45 1. Satisfaction (How satisfied were you with the training you received?)
  - 46  
47 2. Relevance (How relevant was the training to your role/training needs?)
  - 48  
49 3. Understanding (How easy was the material to understand?)
  - 50  
51  
52 4. Recommendation (How likely are you to recommend the training to colleagues?)  
53  
54  
55  
56  
57  
58  
59  
60

- 1 • Knowledge in dementia scale.[18] This measure of knowledge about dementia contains  
2 16 items which respondents categorise as True, False, or Don't know (scored as 0.5). The  
3  
4 16 items which respondents categorise as True, False, or Don't know (scored as 0.5). The  
5  
6 scale has been demonstrated to have satisfactory internal reliability with Cronbach alpha  
7  
8 of 0.72 reported. Possible scores range from 0-21.  
9
- 10 • The Dementia Attitudes Scale. [19] This attitude scale consists of two subscales:  
11 dementia knowledge (e.g. people with dementia can enjoy life) and comfort (e.g. I feel  
12 confident around people with dementia), each containing 10 items. Both subscales have  
13  
14 been reported to have good internal reliability with Cronbach alphas reported as 0.83 and  
15  
16 0.85 respectively. The items are rated on a seven-point Likert scale. Possible scores range  
17  
18 from 10-70 for each subscale.  
19
- 20 • The Confidence in Dementia Scale. [18] This is a nine item scale assessing staff  
21 confidence in providing care to people with dementia. The items are measured on a five-  
22  
23 point Likert scale and have been found to demonstrate excellent internal reliability with a  
24  
25 Cronbach alpha of 0.9. Possible scores range from nine to 45.  
26  
27  
28  
29  
30  
31  
32  
33  
34

#### 35 *Data analysis:*

36 SPSSv22 was used to analyse all quantitative data. Descriptive statistics were produced for  
37  
38 demographic data and staff outcomes of knowledge, attitudes and confidence. Hierarchical  
39  
40 regression analysis was performed to examine the amount of variance in staff outcomes  
41  
42 explained by contextual factors and training. Dummy variables were created for categorical  
43  
44 variables (such as staff role) before being entered into the regression model. Where there were  
45  
46 adequate numbers of responses in relation to training packages, these packages were included in  
47  
48 the regression analyses. The training packages were re-categorised and new variables created  
49  
50 based on number of learning outcomes, number of subjects, tier level (1-3) and whether the  
51  
52 training covered specific subjects. Of the 14 different subject areas included in the Framework,  
53  
54  
55  
56  
57  
58  
59  
60

1  
2 only one (pharmacological interventions), was not covered by at least one of the included  
3  
4 training packages. A sample size estimation was calculated using recommendations by  
5  
6 Tabachnick and Fidel [20] which state the formula  $50 + 8m$  whereby  $m$  is the number of  
7  
8 independent variables. A total of 36 independent variables were created suggesting a sample size  
9  
10 of 338 would be sufficient for hierarchical regression. Preliminary analysis was conducted to  
11  
12 ensure no violation of the assumptions of normality, linearity, multi-collinearity, and  
13  
14 homoscedasticity. The variables were entered into the hierarchical regression model in the  
15  
16 following three steps:  
17  
18

19  
20 Step 1: Staff characteristics including, gender, age, ethnicity, staff role and length of time in role.  
21

22 Step 2: Pedagogical variables including duration of training, mode of delivery, when completed,  
23  
24 where completed and number of training courses completed.  
25

26  
27 Step 3: Content variables including training tier, number of learning outcomes, number of  
28  
29 subjects, and subject areas covered.  
30

### 31 *Patient and Public Involvement:*

32  
33  
34

35 Patient and public involvement (PPI) was an important aspect of this study and considered to be  
36  
37 experts by experience [21] and were involved from the conception and design of the study to  
38  
39 dissemination of the outcomes. The core PPI group consisted of three people living with  
40  
41 dementia and eight family members, and met 15 times over the lifetime of the study. Throughout  
42  
43 the study, as recommended by Mathie et al [22] and Ocloo et al [23] there was a particular  
44  
45 emphasis on the active involvement of experts by experience, particularly in aspects of the  
46  
47 research process which are less frequently seen in PPI, such as design, data collection, and  
48  
49 analysis. Within the work package reported in this article, experts by experience took active part  
50  
51 in the following aspects: designing survey materials, ensuring appropriate language was used,  
52  
53 and interpretation of the findings.  
54  
55  
56  
57  
58  
59  
60

## RESULTS

### *Participants:*

A total of 668 participants who had participated in at least one of the training packages of interest, completed the survey, representing 60 training packages in total. Due to a low response rate for some packages, to permit robust analysis, only packages with ten or more respondents were included in subsequent data analysis. This resulted in 18 dementia education and training packages with a total of 553 respondents being included in the final sample. Approximately 88.4% of the sample identified as female and 94.4% as white British. Further staff characteristics are presented in table 1.

Insert Table 1 here.

### *Impact of dementia training on staff knowledge*

The knowledge scores for the overall sample ranged from 7.5 to 16 (out of a potential score of 21) and the average score achieved was 13.80 (SD = 1.86). The final hierarchical model accounted for 18% of the variance in staff knowledge ( $F = 2.77, p < .01$ ). Staff characteristics accounted for 6% of the variance, pedagogical variables accounted for 4% and content variables accounted for 8% of the variance in staff knowledge. An examination of the co-efficients suggests older age and having more than two years of experience in role were variables that accounted for a significant amount of variance in staff knowledge. Having completed either face to face delivery of training, e-learning, or simulation based training, training which covered a higher number of learning outcomes across the Framework, and completion of tier one training had a larger impact on staff knowledge. Interestingly those who had only completed subjects covering health and wellbeing, and families and carers as partners in dementia care had lower levels of staff knowledge. Those who had completed leadership subjects in addition to other

1  
2 subjects demonstrated higher levels of knowledge. Knowledge hierarchical regression results are  
3  
4 presented in Table 2.  
5

6  
7 Insert Table 2 here

8  
9 *Impact of training on attitudes (knowledge)*

10  
11 Participant scores ranged from 12-56 (highest score possible is 70) with regards to the  
12  
13 knowledge subscale from the O'Connor Attitude measure, with an average score of 51.68 (SD =  
14  
15 5.08). The final hierarchical regression model accounted for 22% of the variance in staff  
16  
17 attitudinal knowledge (F = 3.80, p < .01). Staff characteristics accounted for 3% of the variance,  
18  
19 pedagogical variables accounted for 8% and content variables accounted for 11% of the variance  
20  
21 in staff attitudinal knowledge. Similar variables accounted for a significant amount of variance in  
22  
23 staff attitudinal knowledge as they did factual knowledge: older age, having more than two years  
24  
25 of experience in role, face to face delivery of training, mentoring, simulation based training, and  
26  
27 completion of tier two training. Again, those who had completed health and wellbeing, and  
28  
29 families and carers as partners in dementia care accounted for lower levels of staff attitudinal  
30  
31 knowledge. Attitudinal knowledge hierarchical regression results are presented in Table 3.  
32  
33  
34  
35

36  
37 Insert Table 3 here

38  
39 *Impact of training on attitudes (staff comfort)*

40  
41 Attitude (with regards to comfort levels) scores ranged from 12-56 (highest possible  
42  
43 score is 70) with an average score of 51.51 (SD = 5.08). The final hierarchical regression model  
44  
45 accounted for 14% of the variance in how comfortable staff perceived themselves to be in  
46  
47 delivering dementia care. Staff characteristic accounted for 3% of the variance, pedagogical  
48  
49 variables accounted for 7% and content variables accounted for 4% of the variance in staff  
50  
51 comfort levels. Significant determinants of staff comfort included: ethnicity (being white  
52  
53 British), face to face delivery of training, e learning, number of courses attended, and completion  
54  
55  
56  
57  
58  
59  
60

1  
2 of tier three training. Those who had completed health and wellbeing training again had lower  
3  
4 levels of comfort, however, those who had completed equality and diversity training were found  
5  
6 to have higher levels of comfort. Attitude (comfort) hierarchical regression results are presented  
7  
8 in Table 4.  
9

10  
11 Insert table 4 here.  
12  
13

### 14 15 *Impact of training on staff confidence*

16  
17 With regards to staff confidence, scores ranged from 11 to 45 (highest possible score is 45), with  
18  
19 an average score of 35.31 (SD = 7.64). The final hierarchical model accounted for 29% of the  
20  
21 variance in staff confidence. Staff characteristics accounted for 10% of the variance, pedagogical  
22  
23 factors accounted for 11% and content variables accounted for 8% of the variance in staff  
24  
25 confidence. Only staff characteristics were found to significantly determine variance in staff  
26  
27 confidence. Those who were older in age, had more than one year experience and were either  
28  
29 clinical (qualified or non qualified) or management level staff were more likely to have high  
30  
31 levels of staff confidence. Staff confidence hierarchical regression results are presented in Table  
32  
33  
34  
35  
36  
37 5.  
38

39  
40 Insert Table 5 here.  
41  
42

## 43 44 DISCUSSION

45  
46 The purpose of this study was to establish the impact of dementia education and training  
47  
48 on the knowledge, attitudes and confidence of health and social care staff. The findings suggest  
49  
50 that dementia education and training has limited impact on the knowledge, attitudes and  
51  
52 confidence of health and social care staff. Although the final regression models including staff  
53  
54 characteristics, pedagogical factors and training content variables were statistically significant,  
55  
56  
57  
58  
59



1  
2 they accounted for less than 30% of the variance in staff outcomes, suggesting other factors  
3  
4 beyond dementia education and training have greater impact on staff knowledge, attitudes and  
5  
6 confidence.  
7

8  
9 The final models indicated that experience was an important influencing factor, with  
10  
11 older staff age and longer time in role, being important determinants of staff knowledge, attitudes  
12  
13 and confidence. With regards to pedagogical factors, training courses that made use of face to  
14  
15 face teaching, with a combination of simulation based learning or e learning, were the most  
16  
17 likely to have an impact on staff outcomes. Training content was found to have limited impact on  
18  
19 staff outcomes, with perhaps the most interesting finding being that completion of tier one  
20  
21 dementia education and training was most impactful for staff knowledge as measured by the  
22  
23 KIDE [18], tier two training was most impactful on staff attitudes and tier three was associated  
24  
25 with greater staff confidence. The results also suggest that whilst training content variables are  
26  
27 important when attempting to improve staff knowledge, more consideration should be given to  
28  
29 pedagogical factors when training is aiming to improve staff attitude and confidence.  
30  
31  
32  
33

34 Smith et al [17] highlight in their recent audit of dementia education and training that  
35  
36 approximately 77% of dementia education and training programmes cover learning outcomes  
37  
38 associated with the subjects: Health and Wellbeing, and Families and Carers as Partners. The  
39  
40 current findings suggest that staff who had completed these subjects had lower levels of  
41  
42 knowledge and more negative attitudes than those who had completed other subjects. Those who  
43  
44 had completed learning outcomes associated with equality and diversity and also leadership were  
45  
46 more likely to have better knowledge and attitudes. The audit suggested that only 33% of  
47  
48 reported dementia education and training in England covers learning outcomes associated with  
49  
50 leadership. Furthermore, Smith et al. [17] report that approximately 70% of dementia education  
51  
52 and training programmes met the Tier one learning outcomes as set out by Dementia Core Skills  
53  
54  
55  
56  
57  
58  
59  
60

1  
2 Framework [9], and less than 40% met the requirements for Tier two and Tier three. The findings  
3  
4 from the current study suggest that Tier 2 and Tier 3 training is required to develop a dementia  
5  
6 care workforce that fosters positive attitudes and is confident in providing high quality dementia  
7  
8 care. However, this may also be confounded by level of contact, that is those who have  
9  
10 completed Tier 2 or Tier 3 training are more likely to spend more time with people living with  
11  
12 dementia. The more positive attitudes and confidence may be due to experience as opposed to  
13  
14 level of training.  
15  
16

17  
18 The findings of this study echo findings of previous studies reporting limited impact of  
19  
20 dementia education and training on staff outcomes [13-15]. However much past research has  
21  
22 focused on specific training programmes with an emphasis on the content of the training  
23  
24 programme. Whilst the current results suggest that there was a limited impact on staff outcomes  
25  
26 as a result of training, this may be due to the included training programmes being primarily  
27  
28 focused on learning outcomes and subjects rather than on pedagogical factors. The results  
29  
30 suggest that for training to be impactful beyond staff knowledge development, pedagogical  
31  
32 factors, such as mode of delivery, need to be considered. The results demonstrate that the most  
33  
34 impactful training programmes were those that were delivered face to face with some form of  
35  
36 simulation based learning, mentoring and or e-learning. These findings are in-line with those  
37  
38 reported by Surr et al. [16] in their systematic review. The review highlighted that the most  
39  
40 effective dementia education and training packages were those that were delivered face to face  
41  
42 by an experienced trainer, included practice based learning underpinned by theory and clear  
43  
44 guidelines for clinical practice. The review highlighted the difficulty of establishing a single  
45  
46 effective training programme for a diverse care workforce. We echo those observations as the  
47  
48 current findings suggest that diverse pedagogical and subject content factors were of importance  
49  
50 for staff at varying levels of experience.  
51  
52  
53  
54  
55  
56  
57  
58  
59  
60

1  
2 The findings of the current study should be interpreted with caution. The main limitation of  
3  
4 the study is the homogenous staff sample who were mainly older, white British women, who had  
5  
6 worked in clinical roles for over 10 years. This limits the generalisability of the findings to the  
7  
8 dementia care workforce, who are considered to be heterogeneous. The survey had a low  
9  
10 response rate which may have been due to organisations not being able to reach relevant staff,  
11  
12 due to staff either moving away or the organisation not keeping a record of who had completed  
13  
14 the training. The survey was only available in the English language and was also reported to be  
15  
16 lengthy to complete, potentially further limiting responses from participants from diverse  
17  
18 backgrounds. Furthermore, the design of the study limited the possibilities of controlling for all  
19  
20 possible confounding factors, due to a small sample size and a large number of independent  
21  
22 variables. It was not possible to explore interactional effects via structural equation modelling or  
23  
24 multi-level modelling due to the limited sample of respondents. Findings related to impact on  
25  
26 staff confidence should also be interpreted with caution as a ceiling effect was observed. A  
27  
28 further limitation is that we were unable to obtain collection of outcome data pre- and post-  
29  
30 training and therefore, it is not possible to determine whether staff knowledge, attitudes and  
31  
32 skills were a direct result of attendance at the reported dementia education or training  
33  
34 programme.  
35  
36  
37  
38  
39  
40

41 Despite the above limitations, a large enough sample of staff was recruited to explore the  
42  
43 impact of training and the features of impactful training. The findings have clear implications  
44  
45 for all health and social care staff who are required to undergo some form of dementia education  
46  
47 and training. The study also has implications for policy makers and training commissioners. It is  
48  
49 a requirement of the National Dementia Strategy [6] to develop an informed dementia care  
50  
51 workforce. This study suggests that training providers and commissioners need to move beyond  
52  
53 subject learning outcomes and also consider pedagogical factors and depth of education to have a  
54  
55  
56  
57  
58  
59  
60

1  
2 truly significant impact on staff attitudes and confidence. Further research is required to establish  
3  
4 the specific needs of distinct health and social care staff for example the training needs of  
5  
6 working in acute hospital care will differ from those working in care home settings.  
7  
8  
9

10  
11 The findings of this study suggest that currently dementia education and training has some  
12  
13 limited impact on the knowledge, attitudes and confidence of health and social care staff. The  
14  
15 pedagogical factors of training such as mode of delivery are important in ensuring training is  
16  
17 effective in changing attitudes and confidence as well as staff knowledge. Dementia education  
18  
19 and training providers/commissioners should consider staff characteristics and pedagogical  
20  
21 factors as well as subject content when providing dementia education and training to the  
22  
23 dementia care workforce.  
24  
25  
26  
27  
28  
29  
30  
31  
32  
33  
34  
35  
36  
37  
38  
39  
40  
41  
42  
43  
44  
45  
46  
47  
48  
49  
50  
51  
52  
53  
54  
55  
56  
57  
58  
59  
60

## REFERENCES

- [1] Alzheimer's Disease International. Dementia: A Public Health Priority. London: WHO; 2012. [https://www.who.int/mental\\_health/publications/dementia\\_report\\_2012/en/](https://www.who.int/mental_health/publications/dementia_report_2012/en/).
- [2] Alzheimer's Disease International. World Alzheimer Report. The state of the art dementia research; New frontiers. London, 2018. <https://www.alz.co.uk/news/world-alzheimer-report2018-state-of-art-of-dementia-research-newfrontiers>.
- [3] Alzheimer's Society. Counting the cost. Caring for people with dementia on hospital wards. London: Alzheimer's Society; 2009. [https://www.alzheimers.org.uk/sites/default/files/2018-05/Counting\\_the\\_cost\\_report.pdf](https://www.alzheimers.org.uk/sites/default/files/2018-05/Counting_the_cost_report.pdf).
- [4] Prince M, Knapp M, Guerchet M, et al. Dementia UK: report to the Alzheimer's society. London: Alzheimer's Society; 2014. [https://www.alzheimers.org.uk/sites/default/files/migrate/downloads/dementia\\_uk\\_update.pdf](https://www.alzheimers.org.uk/sites/default/files/migrate/downloads/dementia_uk_update.pdf).
- [5] Becker, M.A., Boaz, T.L., Andel, R., Gum, A.M. and Papadopoulos, A.S., 2010. Predictors of preventable nursing home hospitalizations: the role of mental disorders and dementia. *The American Journal of Geriatric Psychiatry*, 18(6), pp.475-482.
- [6] Department of Health, Living well with dementia: A National Dementia Strategy. 2009, Department of Health: London.
- [7] Department of Health, Prime Minister's challenge on dementia. delivering major improvements in dementia care and research by 2015. 2012, Department of Health: London
- [8] Department of Health, Prime Minister's challenge on dementia 2020. 2015, Department of Health: London
- [9] Skills for Health, Health Education England, Skills for Care. Dementia Core Skills Education and Training Framework Skills for Health, London; 2015. [https://www.housinglin.org.uk/\\_assets/Resources/Housing/OtherOrganisation/Dementia\\_Core\\_Skills\\_Education\\_and\\_Training\\_Framework.pdf](https://www.housinglin.org.uk/_assets/Resources/Housing/OtherOrganisation/Dementia_Core_Skills_Education_and_Training_Framework.pdf).
- [10] Liu JY, Lai C, Dai D, et al. Attitudes in the management of patients with dementia: comparison in doctors with and without special training. *East Asian archives of psychiatry*. 2013 Mar;23(1):13.
- [11] Spector A, Orrell M, Goyder J. A systematic review of staff training interventions to reduce the behavioural and psychological symptoms of dementia. *Ageing research reviews*. 2013 Jan 1;12(1):354-64.
- [12] Galvin JE, Meuser TM, Morris JC. Improving physician awareness of Alzheimer's disease and enhancing recruitment: the Clinician Partners Program. *Alzheimer disease and associated disorders*. 2012 Jan;26(1):61.

- 1  
2 [13] Beer C, Horner B, Flicker L, et al. A cluster-randomised trial of staff education to improve  
3 the quality of life of people with dementia living in residential care: the DIRECT study. PloS  
4 one. 2011;6(11).  
5
- 6 [14] Beer LE, Hutchinson SR, Skala-Cordes KK. Communicating with patients who have  
7 advanced dementia: training nurse aide students. Gerontology & geriatrics education. 2012 Oct  
8 1;33(4):402-20.  
9
- 10 [15] Visser SM, McCabe MP, Hudgson C, et al. Managing behavioural symptoms of dementia:  
11 effectiveness of staff education and peer support. Aging and Mental Health. 2008 Jan 1;12(1):47-  
12 55.  
13
- 14 [16] Surr CA, Gates C, Irving D, et al. Effective dementia education and training for the health  
15 and social care workforce: a systematic review of the literature. Review of educational research.  
16 2017 Oct;87(5):966-1002.  
17
- 18 [17] Smith SJ, Parveen S, Sass C, et al. An audit of dementia education and training in UK health  
19 and social care: a comparison with national benchmark standards. BMC health services research.  
20 2019 Dec 1;19(1):711.  
21
- 22 [18] Elvish R, Burrow S, Cawley R, et al. 'Getting to Know Me': The second phase roll-out of a  
23 staff training programme for supporting people with dementia in general hospitals. Dementia.  
24 2018 Jan;17(1):96-109.  
25
- 26 [19] O'Connor ML, McFadden SH. Development and psychometric validation of the Dementia  
27 Attitudes Scale. International Journal of Alzheimer's Disease. 2010;2010.  
28
- 29 [20] Tabachnick BG, Fidell LS, Ullman JB. Using multivariate statistics. Boston, MA: Pearson;  
30 2007 Mar 3.  
31
- 32 [21] Katz A. A council of elders: creating a multi-voiced dialogue in a community of  
33 care. *Social Science and Medicine*. 2000; 50: 851-860.  
34
- 35 [22] Mathie E, Wilson P, Poland F, McNeilly E, Howe A, Staniszewska S, Cowe M, Munday D,  
36 Goodman C. Consumer involvement in health research: a UK scoping and survey. *International*  
37 *Journal of Consumer Studies*, 2014; 1: 35-44.  
38
- 39 [23] Ocloo J, Matthews R. From tokenism to empowerment: progressing patient and public  
40 involvement in healthcare improvement. *BMJ Quality and Safety*. 2016; 8: 626-632.  
41  
42  
43  
44  
45  
46  
47  
48  
49  
50  
51  
52  
53  
54  
55  
56  
57  
58  
59  
60

Table 1. Demographic characteristics of health and social care staff included in the study

| Characteristic | Sub Characteristic        | N   | Percentage |
|----------------|---------------------------|-----|------------|
| Gender         | Male                      | 63  | 11.39      |
|                | Female                    | 489 | 88.4       |
| Ethnicity      | White British             | 552 | 94.4       |
|                | Pakistani                 | 2   | 0.4        |
|                | Indian                    | 5   | 0.9        |
|                | Black African/Caribbean   | 6   | 1.1        |
|                | Mixed ethnicity           | 7   | 1.3        |
|                | Arab                      | 1   | 0.2        |
|                | Not stated                | 4   | 0.7        |
| Age            | 18-24 years               | 27  | 4.9        |
|                | 25-29 years               | 42  | 7.6        |
|                | 30-34 years               | 45  | 8.1        |
|                | 35-39 years               | 55  | 9.9        |
|                | 40-44 years               | 60  | 10.8       |
|                | 45-49 years               | 89  | 16.1       |
|                | 50-54 years               | 102 | 18.4       |
|                | 55-59 years               | 87  | 15.7       |
|                | 60-64 years               | 29  | 5.2        |
|                | 65 years and over         | 15  | 2.7        |
| Role           | Ancillary/clerical        | 39  | 7.1        |
|                | Unqualified clinical/care | 108 | 19.5       |
|                | Qualified clinical        | 194 | 35.1       |
|                | Unit/facility manager     | 26  | 4.7        |
|                | Senior manager            | 65  | 11.8       |
|                | Other                     | 121 | 21.9       |
| Time in role   | Less than 1 years         | 15  | 2.7        |
|                | 1-2 years                 | 45  | 8.1        |
|                | 3-4 years                 | 50  | 9          |
|                | 5-9 years                 | 94  | 17         |
|                | 10-19 years               | 141 | 25.5       |
|                | 20 and over years         | 197 | 35.6       |

Table 2. Summary of hierarchical regression to establish impact of staff characteristics, training content and pedagogical factors on staff knowledge.

| Variables                   | B      | SE    | Beta<br>(Standardised) | P value |
|-----------------------------|--------|-------|------------------------|---------|
| Female                      | .368   | .262  | .063                   | .161    |
| Age                         | -.125  | .042  | -.154                  | .003    |
| Ethnicity (white British)   | -.011  | .052  | -.009                  | .839    |
| Less than 1 year experience | -1.147 | .528  | -.102                  | .030    |
| 1-2 years                   | -1.272 | .360  | -.190                  | .000    |
| 3-4 year                    | -.174  | .341  | -.027                  | .610    |
| 5-9 years                   | -.472  | .269  | -.095                  | .079    |
| 10 plus years               | -.534  | .226  | -.124                  | .019    |
| Role: Ancillary             | .031   | .363  | .004                   | .932    |
| Role: Clinical              | .099   | .251  | .021                   | .692    |
| Role: Manager               | .391   | .422  | .043                   | .354    |
| Role: Senior manager        | .053   | .301  | .009                   | .860    |
| Role: Other                 | -.209  | .256  | -.046                  | .416    |
| Course length               | .002   | .008  | .016                   | .779    |
| Face to face learning       | -5.640 | 2.169 | -.712                  | .010    |
| E learning                  | 2.489  | 1.243 | .314                   | .046    |
| Mentoring                   | -.056  | .424  | -.013                  | .896    |
| Simulation                  | 3.461  | .919  | .893                   | .000    |
| Completion: 1-2 years ago   | -.118  | .192  | -.029                  | .540    |
| More than 3 years ago       | .567   | .363  | .074                   | .119    |
| Number of courses           | -.151  | .232  | -.040                  | .514    |
| Number of learning outcomes | .003   | .313  | .001                   | .991    |
| Number of subjects          | .071   | .034  | .956                   | .038    |
| Tier                        | -.984  | .625  | -.930                  | .116    |
| Awareness                   | -4.377 | 1.283 | -1.190                 | .001    |
| Diagnosis                   | 2.493  | 1.641 | .653                   | .129    |
| Communication               | -.510  | 1.977 | -.076                  | .796    |
| Health and wellbeing        | .651   | .794  | .105                   | .413    |
| Living well with dementia   | -4.510 | 1.333 | -.682                  | .001    |
| Families                    | 2.932  | 1.930 | .763                   | .129    |
| Equality                    | -2.896 | 1.229 | -.496                  | .019    |
| Law                         | -4.350 | 2.356 | -.438                  | .066    |
| Leadership                  | 1.205  | .733  | .237                   | .101    |



Table 3. Summary of hierarchical regression to establish impact of staff characteristics, training content and pedagogical factors on staff knowledge (attitude sub-scale).

| Variables                   | B       | SE    | Beta<br>(Standardised) | P value |
|-----------------------------|---------|-------|------------------------|---------|
| Female                      | 1.047   | .705  | .065                   | .138    |
| Age                         | -.236   | .114  | -.105                  | .038    |
| Ethnicity (white British)   | -.024   | .141  | -.007                  | .866    |
| Less than 1 year experience | -3.637  | 1.421 | -.117                  | .011    |
| 1-2 years                   | -2.010  | .970  | -.108                  | .039    |
| 3-4 year                    | -.871   | .919  | -.048                  | .344    |
| 5-9 years                   | -.337   | .723  | -.024                  | .641    |
| 10 plus years               | -1.008  | .609  | -.084                  | .099    |
| Role: Ancillary             | .926    | .976  | .047                   | .343    |
| Role: Clinical              | .556    | .675  | .042                   | .411    |
| Role: Manager               | 1.391   | 1.135 | .056                   | .221    |
| Role: Senior manager        | .121    | .811  | .008                   | .881    |
| Role: Other                 | -.701   | .690  | -.055                  | .310    |
| Course length               | -.014   | .021  | -.037                  | .505    |
| Face to face learning       | 12.535  | 5.837 | .570                   | .032    |
| E learning                  | 1.667   | 3.346 | .076                   | .619    |
| Mentoring                   | 3.293   | 1.141 | .269                   | .004    |
| Simulation                  | 12.247  | 2.472 | 1.139                  | .000    |
| Completion: 1-2 years ago   | -.587   | .517  | -.052                  | .257    |
| More than 3 years ago       | .353    | .976  | .017                   | .718    |
| Number of courses           | .869    | .624  | .082                   | .165    |
| Number of learning outcomes | -.131   | .842  | -.011                  | .876    |
| Number of subjects          | .115    | .092  | .558                   | .211    |
| Tier                        | -1.078  | 1.682 | -.367                  | .522    |
| Awareness                   | -8.951  | 3.454 | -.877                  | .010    |
| Diagnosis                   | 4.185   | 4.416 | .395                   | .344    |
| Communication               | 8.549   | 5.319 | .456                   | .109    |
| Health and wellbeing        | -2.785  | 2.138 | -.162                  | .193    |
| Living well with dementia   | -13.959 | 3.588 | -.761                  | .000    |
| Families                    | 3.542   | 5.194 | .332                   | .496    |
| Equality                    | -10.931 | 3.307 | -.675                  | .001    |
| Law                         | -2.710  | 6.342 | -.098                  | .669    |
| Leadership                  | 2.341   | 1.971 | .166                   | .236    |

Table 4. Summary of hierarchical regression to establish impact of staff characteristics, training content and pedagogical factors on staff comfort (attitude sub-scale).

| <b>Variables</b>            | <b>B</b> | <b>SE</b> | <b>Beta<br/>(Standardised)</b> | <b>P value</b> |
|-----------------------------|----------|-----------|--------------------------------|----------------|
| Female                      | -.792    | .810      | -.045                          | .328           |
| Age                         | .017     | .130      | .007                           | .896           |
| Ethnicity (white British)   | .369     | .162      | .105                           | .023           |
| Less than 1 year experience | 1.368    | 1.632     | .040                           | .403           |
| 1-2 years                   | -.289    | 1.114     | -.014                          | .795           |
| 3-4 year                    | -.920    | 1.055     | -.047                          | .384           |
| 5-9 years                   | -.031    | .830      | -.002                          | .970           |
| 10 plus years               | -.572    | .700      | -.044                          | .414           |
| Role: Ancillary             | -.160    | 1.121     | -.007                          | .887           |
| Role: Clinical              | -.305    | .776      | -.021                          | .694           |
| Role: Manager               | -1.040   | 1.304     | -.038                          | .425           |
| Role: Senior manager        | -.544    | .932      | -.031                          | .560           |
| Role: Other                 | .822     | .792      | .060                           | .300           |
| Course length               | -.007    | .024      | -.016                          | .779           |
| Face to face learning       | -16.595  | 6.706     | -.693                          | .014           |
| E learning                  | -7.606   | 3.844     | -.317                          | .048           |
| Mentoring                   | 1.597    | 1.311     | .120                           | .224           |
| Simulation                  | -3.883   | 2.840     | -.331                          | .172           |
| Completion: 1-2 years ago   | .790     | .593      | .064                           | .184           |
| More than 3 years ago       | .000     | 1.122     | .000                           | 1.000          |
| Number of courses           | -1.111   | .717      | -.096                          | .122           |
| Number of learning outcomes | 2.333    | .968      | .186                           | .016           |
| Number of subjects          | -.165    | .105      | -.736                          | .118           |
| Tier                        | 2.107    | 1.932     | .659                           | .276           |
| Awareness                   | 10.642   | 3.968     | .957                           | .008           |
| Diagnosis                   | -4.585   | 5.073     | -.397                          | .367           |
| Communication               | 6.454    | 6.111     | .316                           | .291           |
| Health and wellbeing        | -3.009   | 2.456     | -.161                          | .221           |
| Living well with dementia   | 11.148   | 4.122     | .558                           | .007           |
| Families                    | -8.726   | 5.967     | -.751                          | .144           |
| Equality                    | .868     | 3.799     | .049                           | .819           |
| Law                         | 15.096   | 7.286     | .502                           | .039           |
| Leadership                  | -2.011   | 2.265     | -.131                          | .375           |

Table 5. Summary of hierarchical regression to establish impact of staff characteristics, training content and pedagogical factors on staff confidence.

| Variables                   | B      | SE    | Beta (Standardised) | P value |
|-----------------------------|--------|-------|---------------------|---------|
| Female                      | 1.588  | .974  | .068                | .104    |
| Age                         | -.405  | .157  | -.124               | .010    |
| Ethnicity (white British)   | -.068  | .195  | -.014               | .729    |
| Less than 1 year experience | -3.991 | 1.965 | -.089               | .043    |
| 1-2 years                   | -1.906 | 1.340 | -.071               | .156    |
| 3-4 year                    | -2.027 | 1.270 | -.078               | .111    |
| 5-9 years                   | -.533  | .999  | -.027               | .594    |
| 10 plus years               | -.213  | .842  | -.012               | .801    |
| Role: Ancillary             | -3.823 | 1.349 | -.133               | .005    |
| Role: Clinical              | .852   | .934  | .045                | .362    |
| Role: Manager               | 1.606  | 1.569 | .044                | .307    |
| Role: Senior manager        | -.209  | 1.121 | -.009               | .853    |
| Role: Other                 | -2.317 | .953  | -.127               | .015    |
| Course length               | .012   | .029  | .021                | .688    |
| Face to face learning       | 1.547  | 8.071 | .049                | .848    |
| E learning                  | 4.581  | 4.626 | .144                | .323    |
| Mentoring                   | 1.861  | 1.578 | .105                | .239    |
| Simulation                  | 4.508  | 3.418 | .290                | .188    |
| Completion: 1-2 years ago   | .416   | .714  | .026                | .560    |
| More than 3 years ago       | -.442  | 1.350 | -.014               | .743    |
| Number of courses           | .860   | .863  | .056                | .319    |
| Number of learning outcomes | .015   | 1.165 | .001                | .990    |
| Number of subjects          | .113   | .127  | .381                | .371    |
| Tier                        | -1.617 | 2.326 | -.381               | .487    |
| Awareness                   | -1.465 | 4.775 | -.099               | .759    |
| Diagnosis                   | -.151  | 6.105 | -.010               | .980    |
| Communication               | 4.147  | 7.355 | .153                | .573    |
| Health and wellbeing        | .158   | 2.956 | .006                | .957    |
| Living well with dementia   | -2.670 | 4.961 | -.101               | .591    |
| Families                    | .437   | 7.181 | .028                | .951    |
| Equality                    | -6.774 | 4.572 | -.289               | .139    |
| Law                         | 5.218  | 8.768 | .131                | .552    |
| Leadership                  | .972   | 2.726 | .048                | .722    |

# Reporting checklist for cross sectional study.

Based on the STROBE cross sectional guidelines.

## Instructions to authors

Complete this checklist by entering the page numbers from your manuscript where readers will find each of the items listed below.

Your article may not currently address all the items on the checklist. Please modify your text to include the missing information. If you are certain that an item does not apply, please write "n/a" and provide a short explanation.

Upload your completed checklist as an extra file when you submit to a journal.

In your methods section, say that you used the STROBE cross sectional reporting guidelines, and cite them as:

von Elm E, Altman DG, Egger M, Pocock SJ, Gøtzsche PC, Vandenbroucke JP. The Strengthening the Reporting of Observational Studies in Epidemiology (STROBE) Statement: guidelines for reporting observational studies.

|                           | Reporting Item                                                                                                      | Page Number |
|---------------------------|---------------------------------------------------------------------------------------------------------------------|-------------|
| <b>Title and abstract</b> |                                                                                                                     |             |
| Title                     | <a href="#">#1a</a> Indicate the study's design with a commonly used term in the title or the abstract              | Page 1      |
| Abstract                  | <a href="#">#1b</a> Provide in the abstract an informative and balanced summary of what was done and what was found | Page 1      |
| <b>Introduction</b>       |                                                                                                                     |             |
| Background / rationale    | <a href="#">#2</a> Explain the scientific background and rationale for the investigation being reported             | Page 3      |
| Objectives                | <a href="#">#3</a> State specific objectives, including any prespecified hypotheses                                 | Page 5      |
| <b>Methods</b>            |                                                                                                                     |             |
| Study design              | <a href="#">#4</a> Present key elements of study design early in the                                                | Page 5      |

paper

|    |                      |                      |                                                               |
|----|----------------------|----------------------|---------------------------------------------------------------|
| 1  |                      |                      |                                                               |
| 2  |                      |                      |                                                               |
| 3  | Setting              | <a href="#">#5</a>   | Describe the setting, locations, and relevant dates, Page 6   |
| 4  |                      |                      | including periods of recruitment, exposure, follow-up,        |
| 5  |                      |                      | and data collection                                           |
| 6  |                      |                      |                                                               |
| 7  |                      |                      |                                                               |
| 8  | Eligibility criteria | <a href="#">#6a</a>  | Give the eligibility criteria, and the sources and Page 6     |
| 9  |                      |                      | methods of selection of participants.                         |
| 10 |                      |                      |                                                               |
| 11 |                      | <a href="#">#7</a>   | Clearly define all outcomes, exposures, predictors, Page 6    |
| 12 |                      |                      | potential confounders, and effect modifiers. Give             |
| 13 |                      |                      | diagnostic criteria, if applicable                            |
| 14 |                      |                      |                                                               |
| 15 |                      |                      |                                                               |
| 16 |                      |                      |                                                               |
| 17 | Data sources /       | <a href="#">#8</a>   | For each variable of interest give sources of data Page 6     |
| 18 | measurement          |                      | and details of methods of assessment                          |
| 19 |                      |                      | (measurement). Describe comparability of                      |
| 20 |                      |                      | assessment methods if there is more than one                  |
| 21 |                      |                      | group. Give information separately for for exposed            |
| 22 |                      |                      | and unexposed groups if applicable.                           |
| 23 |                      |                      |                                                               |
| 24 |                      |                      |                                                               |
| 25 |                      |                      |                                                               |
| 26 |                      |                      |                                                               |
| 27 | Bias                 | <a href="#">#9</a>   | Describe any efforts to address potential sources of Page 7   |
| 28 |                      |                      | bias                                                          |
| 29 |                      |                      |                                                               |
| 30 |                      |                      |                                                               |
| 31 | Study size           | <a href="#">#10</a>  | Explain how the study size was arrived at Page 7              |
| 32 |                      |                      |                                                               |
| 33 | Quantitative         | <a href="#">#11</a>  | Explain how quantitative variables were handled in Page 7     |
| 34 | variables            |                      | the analyses. If applicable, describe which groupings         |
| 35 |                      |                      | were chosen, and why                                          |
| 36 |                      |                      |                                                               |
| 37 |                      |                      |                                                               |
| 38 | Statistical          | <a href="#">#12a</a> | Describe all statistical methods, including those used Page 7 |
| 39 | methods              |                      | to control for confounding                                    |
| 40 |                      |                      |                                                               |
| 41 |                      |                      |                                                               |
| 42 | Statistical          | <a href="#">#12b</a> | Describe any methods used to examine subgroups Page 7         |
| 43 | methods              |                      | and interactions                                              |
| 44 |                      |                      |                                                               |
| 45 |                      |                      |                                                               |
| 46 | Statistical          | <a href="#">#12c</a> | Explain how missing data were addressed Page 7                |
| 47 | methods              |                      |                                                               |
| 48 |                      |                      |                                                               |
| 49 |                      |                      |                                                               |
| 50 | Statistical          | <a href="#">#12d</a> | If applicable, describe analytical methods taking Page 7      |
| 51 | methods              |                      | account of sampling strategy                                  |
| 52 |                      |                      |                                                               |
| 53 |                      |                      |                                                               |
| 54 | Statistical          | <a href="#">#12e</a> | Describe any sensitivity analyses Page 7                      |
| 55 | methods              |                      |                                                               |
| 56 |                      |                      |                                                               |
| 57 | <b>Results</b>       |                      |                                                               |
| 58 |                      |                      |                                                               |
| 59 |                      |                      |                                                               |
| 60 |                      |                      |                                                               |

|    |                  |                      |                                                                                                                                                                                                                                                                                |                                                                 |
|----|------------------|----------------------|--------------------------------------------------------------------------------------------------------------------------------------------------------------------------------------------------------------------------------------------------------------------------------|-----------------------------------------------------------------|
| 1  | Participants     | <a href="#">#13a</a> | Report numbers of individuals at each stage of study—eg numbers potentially eligible, examined for eligibility, confirmed eligible, included in the study, completing follow-up, and analysed. Give information separately for for exposed and unexposed groups if applicable. |                                                                 |
| 2  |                  |                      |                                                                                                                                                                                                                                                                                |                                                                 |
| 3  |                  |                      |                                                                                                                                                                                                                                                                                |                                                                 |
| 4  |                  |                      |                                                                                                                                                                                                                                                                                |                                                                 |
| 5  |                  |                      |                                                                                                                                                                                                                                                                                |                                                                 |
| 6  |                  |                      |                                                                                                                                                                                                                                                                                |                                                                 |
| 7  |                  |                      |                                                                                                                                                                                                                                                                                |                                                                 |
| 8  |                  |                      |                                                                                                                                                                                                                                                                                |                                                                 |
| 9  |                  |                      |                                                                                                                                                                                                                                                                                |                                                                 |
| 10 | Participants     | <a href="#">#13b</a> | Give reasons for non-participation at each stage                                                                                                                                                                                                                               | NA                                                              |
| 11 |                  |                      |                                                                                                                                                                                                                                                                                |                                                                 |
| 12 |                  |                      |                                                                                                                                                                                                                                                                                |                                                                 |
| 13 |                  |                      |                                                                                                                                                                                                                                                                                | Reasons for non                                                 |
| 14 |                  |                      |                                                                                                                                                                                                                                                                                | participation were                                              |
| 15 |                  |                      |                                                                                                                                                                                                                                                                                | not collected                                                   |
| 16 |                  |                      |                                                                                                                                                                                                                                                                                |                                                                 |
| 17 |                  |                      |                                                                                                                                                                                                                                                                                |                                                                 |
| 18 | Participants     | <a href="#">#13c</a> | Consider use of a flow diagram                                                                                                                                                                                                                                                 | NA                                                              |
| 19 |                  |                      |                                                                                                                                                                                                                                                                                |                                                                 |
| 20 |                  |                      |                                                                                                                                                                                                                                                                                |                                                                 |
| 21 | Descriptive data | <a href="#">#14a</a> | Give characteristics of study participants (eg demographic, clinical, social) and information on exposures and potential confounders. Give information separately for exposed and unexposed groups if applicable.                                                              | Page 9                                                          |
| 22 |                  |                      |                                                                                                                                                                                                                                                                                |                                                                 |
| 23 |                  |                      |                                                                                                                                                                                                                                                                                |                                                                 |
| 24 |                  |                      |                                                                                                                                                                                                                                                                                |                                                                 |
| 25 |                  |                      |                                                                                                                                                                                                                                                                                |                                                                 |
| 26 |                  |                      |                                                                                                                                                                                                                                                                                |                                                                 |
| 27 |                  |                      |                                                                                                                                                                                                                                                                                |                                                                 |
| 28 |                  |                      |                                                                                                                                                                                                                                                                                |                                                                 |
| 29 | Descriptive data | <a href="#">#14b</a> | Indicate number of participants with missing data for each variable of interest                                                                                                                                                                                                | Number of participants included in all analysis Page 10 onwards |
| 30 |                  |                      |                                                                                                                                                                                                                                                                                |                                                                 |
| 31 |                  |                      |                                                                                                                                                                                                                                                                                |                                                                 |
| 32 |                  |                      |                                                                                                                                                                                                                                                                                |                                                                 |
| 33 |                  |                      |                                                                                                                                                                                                                                                                                |                                                                 |
| 34 |                  |                      |                                                                                                                                                                                                                                                                                |                                                                 |
| 35 |                  |                      |                                                                                                                                                                                                                                                                                |                                                                 |
| 36 |                  |                      |                                                                                                                                                                                                                                                                                |                                                                 |
| 37 | Outcome data     | <a href="#">#15</a>  | Report numbers of outcome events or summary measures. Give information separately for exposed and unexposed groups if applicable.                                                                                                                                              | Page 10                                                         |
| 38 |                  |                      |                                                                                                                                                                                                                                                                                |                                                                 |
| 39 |                  |                      |                                                                                                                                                                                                                                                                                |                                                                 |
| 40 |                  |                      |                                                                                                                                                                                                                                                                                |                                                                 |
| 41 |                  |                      |                                                                                                                                                                                                                                                                                |                                                                 |
| 42 |                  |                      |                                                                                                                                                                                                                                                                                |                                                                 |
| 43 | Main results     | <a href="#">#16a</a> | Give unadjusted estimates and, if applicable, confounder-adjusted estimates and their precision (eg, 95% confidence interval). Make clear which confounders were adjusted for and why they were included                                                                       | Page 10                                                         |
| 44 |                  |                      |                                                                                                                                                                                                                                                                                |                                                                 |
| 45 |                  |                      |                                                                                                                                                                                                                                                                                |                                                                 |
| 46 |                  |                      |                                                                                                                                                                                                                                                                                |                                                                 |
| 47 |                  |                      |                                                                                                                                                                                                                                                                                |                                                                 |
| 48 |                  |                      |                                                                                                                                                                                                                                                                                |                                                                 |
| 49 |                  |                      |                                                                                                                                                                                                                                                                                |                                                                 |
| 50 |                  |                      |                                                                                                                                                                                                                                                                                |                                                                 |
| 51 | Main results     | <a href="#">#16b</a> | Report category boundaries when continuous variables were categorized                                                                                                                                                                                                          | Page 8/9/10                                                     |
| 52 |                  |                      |                                                                                                                                                                                                                                                                                |                                                                 |
| 53 |                  |                      |                                                                                                                                                                                                                                                                                |                                                                 |
| 54 |                  |                      |                                                                                                                                                                                                                                                                                |                                                                 |
| 55 | Main results     | <a href="#">#16c</a> | If relevant, consider translating estimates of relative risk into absolute risk for a meaningful time period                                                                                                                                                                   | NA                                                              |
| 56 |                  |                      |                                                                                                                                                                                                                                                                                |                                                                 |
| 57 |                  |                      |                                                                                                                                                                                                                                                                                |                                                                 |
| 58 |                  |                      |                                                                                                                                                                                                                                                                                |                                                                 |
| 59 | Other analyses   | <a href="#">#17</a>  | Report other analyses done—e.g., analyses of                                                                                                                                                                                                                                   | NA                                                              |
| 60 |                  |                      |                                                                                                                                                                                                                                                                                |                                                                 |

subgroups and interactions, and sensitivity analyses

## Discussion

|                          |                     |                                                                                                                                                                  |         |
|--------------------------|---------------------|------------------------------------------------------------------------------------------------------------------------------------------------------------------|---------|
| Key results              | <a href="#">#18</a> | Summarise key results with reference to study objectives                                                                                                         | Page 11 |
| Limitations              | <a href="#">#19</a> | Discuss limitations of the study, taking into account sources of potential bias or imprecision. Discuss both direction and magnitude of any potential bias.      | Page 13 |
| Interpretation           | <a href="#">#20</a> | Give a cautious overall interpretation considering objectives, limitations, multiplicity of analyses, results from similar studies, and other relevant evidence. | Page 13 |
| Generalisability         | <a href="#">#21</a> | Discuss the generalisability (external validity) of the study results                                                                                            | Page 13 |
| <b>Other Information</b> |                     |                                                                                                                                                                  |         |
| Funding                  | <a href="#">#22</a> | Give the source of funding and the role of the funders for the present study and, if applicable, for the original study on which the present article is based    | Page 1  |

None The STROBE checklist is distributed under the terms of the Creative Commons Attribution License CC-BY. This checklist can be completed online using <https://www.goodreports.org/>, a tool made by the [EQUATOR Network](#) in collaboration with [Penelope.ai](#)

# BMJ Open

## The impact of dementia education and training on health and social care staff knowledge, attitudes and confidence: A cross-sectional study

|                                 |                                                                                                                                                                                                                                                                                                                                                                                                                                                    |
|---------------------------------|----------------------------------------------------------------------------------------------------------------------------------------------------------------------------------------------------------------------------------------------------------------------------------------------------------------------------------------------------------------------------------------------------------------------------------------------------|
| Journal:                        | <i>BMJ Open</i>                                                                                                                                                                                                                                                                                                                                                                                                                                    |
| Manuscript ID                   | bmjopen-2020-039939.R1                                                                                                                                                                                                                                                                                                                                                                                                                             |
| Article Type:                   | Original research                                                                                                                                                                                                                                                                                                                                                                                                                                  |
| Date Submitted by the Author:   | 17-Sep-2020                                                                                                                                                                                                                                                                                                                                                                                                                                        |
| Complete List of Authors:       | Parveen , Sahdia; University of Bradford, Smith, Sarah; Leeds Beckett University, School of Health & Community Studies<br>Sass, Cara; Leeds Beckett University<br>Capstick, Andrea; University of Bradford<br>Dennison, Alison; University of Bradford<br>Oyebode, Jan; University of Bradford, School of Dementia Studies<br>Surr, Claire; Leeds Beckett University Faculty of Health and Social Sciences, School of Health and Community Studies |
| <b>Primary Subject Heading</b>: | Medical education and training                                                                                                                                                                                                                                                                                                                                                                                                                     |
| Secondary Subject Heading:      | Evidence based practice                                                                                                                                                                                                                                                                                                                                                                                                                            |
| Keywords:                       | Dementia < NEUROLOGY, EDUCATION & TRAINING (see Medical Education & Training), GERIATRIC MEDICINE                                                                                                                                                                                                                                                                                                                                                  |
|                                 |                                                                                                                                                                                                                                                                                                                                                                                                                                                    |

SCHOLARONE™  
Manuscripts





I, the Submitting Author has the right to grant and does grant on behalf of all authors of the Work (as defined in the below author licence), an exclusive licence and/or a non-exclusive licence for contributions from authors who are: i) UK Crown employees; ii) where BMJ has agreed a CC-BY licence shall apply, and/or iii) in accordance with the terms applicable for US Federal Government officers or employees acting as part of their official duties; on a worldwide, perpetual, irrevocable, royalty-free basis to BMJ Publishing Group Ltd ("BMJ") its licensees and where the relevant Journal is co-owned by BMJ to the co-owners of the Journal, to publish the Work in this journal and any other BMJ products and to exploit all rights, as set out in our [licence](#).

The Submitting Author accepts and understands that any supply made under these terms is made by BMJ to the Submitting Author unless you are acting as an employee on behalf of your employer or a postgraduate student of an affiliated institution which is paying any applicable article publishing charge ("APC") for Open Access articles. Where the Submitting Author wishes to make the Work available on an Open Access basis (and intends to pay the relevant APC), the terms of reuse of such Open Access shall be governed by a Creative Commons licence – details of these licences and which [Creative Commons](#) licence will apply to this Work are set out in our licence referred to above.

Other than as permitted in any relevant BMJ Author's Self Archiving Policies, I confirm this Work has not been accepted for publication elsewhere, is not being considered for publication elsewhere and does not duplicate material already published. I confirm all authors consent to publication of this Work and authorise the granting of this licence.

1  
2 TITLE: The impact of dementia education and training on health and social care staff  
3  
4 knowledge, attitudes and confidence: A cross-sectional study  
5  
6  
7

8  
9 AUTHORS: Sahdia Parveen\*, Sarah J Smith, Cara Sass, Jan R Oyebode, Andrea Capstick,  
10  
11 Alison Dennison and Claire A Surr.  
12  
13

14  
15 \*Corresponding author. Dr Sahdia Parveen. Centre for Applied Dementia Studies, University of  
16  
17 Bradford, Richmond Road, Bradford, West Yorkshire, BD7 1DP. Tel: 01274 236089. Email:  
18  
19 [s.parveen27@bradford.ac.uk](mailto:s.parveen27@bradford.ac.uk)  
20  
21  
22

23  
24  
25 Sarah J Smith [s.j.smith@leedsbeckett.ac.uk](mailto:s.j.smith@leedsbeckett.ac.uk)  
26

27  
28 Cara Sass [c.sass@leedsbeckett.ac.uk](mailto:c.sass@leedsbeckett.ac.uk)  
29

30  
31 Jan R Oyebode [j.oyebode@bradford.ac.uk](mailto:j.oyebode@bradford.ac.uk)  
32

33  
34 Andrea Capstick [a.j.capstick@bradford.ac.uk](mailto:a.j.capstick@bradford.ac.uk)  
35

36  
37 Alison Dennison [a.j.capstick@bradford.ac.uk](mailto:a.j.capstick@bradford.ac.uk)  
38

39  
40 Claire A Surr [c.a.surr@bradford.ac.uk](mailto:c.a.surr@bradford.ac.uk)  
41  
42  
43  
44  
45

#### 46 FUNDING STATEMENT:

47  
48 The report is based on independent research commissioned and funded by the NIHR Policy  
49  
50 Research Programme (Understanding Effective Dementia Workforce Education and Training: A  
51  
52 Formative Evaluation (DeWET Evaluation), PR-R10-0514-12006). The funding body had no  
53  
54 role in the design of the study and collection, analysis, and interpretation of data and in writing  
55  
56 the manuscript. The views expressed in the publication are those of the author(s) and not  
57  
58 necessarily those of the NHS, the NIHR, the Department of Health and Social care, 'arms' length  
59  
60 bodies or other government departments.

1  
2 COMPETING INTERESTS STATEMENT: None to declare  
3  
4  
5

6 AUTHOR CONTRIBUTIONS:  
7

8  
9 SP: Co-led the survey work package with SS. SP was involved with study conception, study  
10 design, led data analysis and authored the manuscript.  
11

12  
13 SS: Co-led the survey work package with SP, was involved with study conception, design and  
14 provision of editorial input into the manuscript.  
15

16  
17 CS: CSs developed and disseminated survey materials, contributed to data management and  
18 editorial input into the manuscript.  
19

20  
21 JO contributed to design, data interpretation and provision of editorial input into the manuscript.  
22

23  
24 AC led the involvement of experts by experience, contributed to the design of the study and  
25 provided editorial input into the manuscript.  
26

27  
28 AD is an expert by experience who was involved with all aspects of this study.  
29

30  
31 CAS: Was Chief Investigator and contributed to study conception, design, data interpretation and  
32 provision of editorial input into the manuscript.  
33

34  
35 ACKNOWLEDGMENTS:  
36

37  
38 We would like to acknowledge and thank all the organisations and individuals that supported this  
39 study. We would also like to acknowledge Ms Michelle Drury for supporting survey  
40 dissemination.  
41  
42

43  
44 DATA SHARING STATEMENT: Data may be made available from the authors upon  
45 reasonable request.  
46  
47

48  
49 WORD COUNT = 3721  
50  
51  
52  
53  
54  
55  
56  
57  
58  
59  
60

## ABSTRACT

Objectives: The aim of this study was to establish the impact of dementia education and training on the knowledge, attitudes and confidence of health and social care staff. The study also aimed to identify the most effective features (content and pedagogical) of dementia education and training.

Design: Cross sectional survey study. Data collection occurred in 2017.

Settings: Health and social care staff in the UK including acute care, mental health community care trusts, primary care, and care homes.

Participants: All health and social care staff who had completed dementia education and training meeting the minimal standards as set by Health Education England, within the past five years were invited to participate in an online survey. A total of 668 health and social care staff provided informed consent and completed an online survey, and responses from 553 participants were included in this study. The majority of the respondents were of white British ethnicity (94.4%) and identified as female (88.4%).

Outcomes: Knowledge, attitude and confidence of health and social care staff.

Results: Hierarchical multiple regression analysis was conducted. Staff characteristics, education and training content variables and pedagogical factors were found to account for 29% of variance in staff confidence ( $F = 4.13$ ,  $p < .001$ ), 22% of variance in attitude (knowledge) ( $F = 3.80$ ,  $p < .001$ ), 18% of the variance in staff knowledge ( $F = 2.77$ ,  $p < .01$ ) and 14% of variance in staff comfort (attitude) ( $F = 2.11$ ,  $p < .01$ ).

Conclusion: The results suggest that dementia education and training has limited impact on health and social care staff learning outcomes. Whilst training content variables were important when attempting to improve staff knowledge, more consideration should be given to pedagogical factors when training is aiming to improve staff attitude and confidence.

1  
2 ARTICLE SUMMARY  
3

4 STRENGTHS AND LIMITATIONS OF THIS STUDY  
5  
6

- 7 • This study explores the impact of a diverse range of dementia education and training  
8 packages.  
9
- 10 • The study explores the impact of pedagogical factors as well as content based variables  
11
- 12 • The sample of health and social care professionals included in this study is not  
13  
14 representative of the dementia care workforce in the UK.  
15
- 16 • The cross-sectional design of the study limits inferences with regards to the impact of  
17  
18 dementia education and training on staff learning outcomes.  
19  
20  
21  
22

23  
24 KEY WORDS  
25

26 Dementia; Alzheimer's Disease, Training, Health care, Social care  
27  
28  
29  
30  
31  
32  
33  
34  
35  
36  
37  
38  
39  
40  
41  
42  
43  
44  
45  
46  
47  
48  
49  
50  
51  
52  
53  
54  
55  
56  
57  
58  
59  
60

## BACKGROUND

There are approximately 50 million people living with dementia worldwide and this is set to increase to 75 million by 2030 and 131.5 million by the year 2050. [1] This increase in the number of people living with dementia is primarily thought to be due to improving health care. Better health care has led to an increased life expectancy, therefore there is a greater proportion of older people worldwide. The rising number of people affected by dementia and the increasing cost has led to a number of countries developing national dementia strategies. These strategies include the need for a health and social care workforce that is appropriately trained and skilled to deliver good dementia care.

Within the UK, there are currently 850, 000 people living with dementia, with the cost of care predicted to be £26 billion. [2] Research estimates that in England up to 40% of patients in hospitals are living with dementia [3] and up to 80% of residents in care homes are living with dementia. [4] Inadequate and poor care leads to a reduced quality of life for people living with dementia and a higher overall cost to the NHS, due to avoidable hospital admissions [5] and longer hospital stays. Therefore, a key feature of English National Dementia Strategies [6-8] is the focus upon dementia education and training for the health and social care workforce, in order to deliver good person-centred care. The ‘dementia workforce’ is defined as any individual who may have contact with people living with dementia in health and social care settings from the point of diagnosis to end of life care. The need for a clear evidence base for effective features of dementia education and training for health and social care staff has also been identified [8].

As part of a national programme of work around implementation of quality dementia education and training, Health Education England developed a Dementia Training Standards Framework [9] (‘The Framework’ hereafter). This set the ‘gold standard’ for training content, with regard to identifying the knowledge and skills needed to deliver good dementia care. It is

1  
2 comprised of three Tiers. Tier 1 is 'Dementia Awareness' and is to be completed by all staff  
3  
4 working in any post in health and social care. Staff with regular contact with people with  
5  
6 dementia complete Tier 2 training, and Tier 3 provides advanced skills for leaders in dementia  
7  
8 care. The Framework consists of 14 subjects in total. Each subject comprises of several learning  
9  
10 outcomes that staff are required to accomplish in order to deliver good quality and effective  
11  
12 dementia care. Whilst the Framework provides comprehensive guidance for key content for  
13  
14 dementia education and training, it does not take into account pedagogical considerations of  
15  
16 training.  
17  
18  
19

20  
21 There has been a growing body of research exploring the impact of dementia education  
22  
23 on staff knowledge and skills. Some studies [10-17] have demonstrated that dementia education  
24  
25 and training can improve staff knowledge, confidence, foster positive attitudes and produce  
26  
27 better outcomes for people living with dementia. In contrast, some studies have demonstrated  
28  
29 that dementia training lacks efficacy and has no impact on staff or patient outcomes. [18-20] A  
30  
31 recent review by Surr et al [21] identified 152 studies exploring the impact of dementia  
32  
33 education and training. The findings of this comprehensive review suggest that dementia  
34  
35 education can be efficacious if pedagogical factors are considered. The review suggests that  
36  
37 training and education was found to be most effective if staff considered the training to be  
38  
39 relevant to their role, involved active face to face participation, underpinned practice based  
40  
41 learning with theory, the training was delivered by an experienced facilitator, was at least eight  
42  
43 hours in duration and provided structured guidelines for care practice. The review highlights that  
44  
45 the dementia workforce is diverse and has heterogeneous training and education needs. This  
46  
47 makes identifying effective training components highly complex. Previous studies (with the  
48  
49 exception of Jack-Waugh et al., 2018) exploring the impact of dementia education and training  
50  
51  
52  
53  
54  
55  
56  
57  
58  
59  
60

1  
2 have primarily focused on a single training programme with limited focus on pedagogical  
3  
4 considerations, and with a select group of health and social care staff.  
5

6 The aim of this study is to explore the impact of dementia education and training on  
7  
8 health and social care staff in the UK and to identify the most effective features (content and  
9  
10 pedagogical) and other factors of dementia training. It aimed to include a diverse range of  
11  
12 dementia education and training packages and staff working across different service settings that  
13  
14 provide dementia care.  
15  
16

## 17 METHOD

### 18 *Study design:*

19  
20 This study is a survey based cross-sectional observational study.  
21  
22

### 23 *Setting:*

24  
25 This study was conducted in England. Data collection occurred in 2017 via an online survey  
26  
27 completed by health and social care (working in acute care, community mental health care trust,  
28  
29 primary care, pharmacies and care homes) staff.  
30  
31  
32

### 33 *Procedure:*

34  
35 This study received ethical approval from Leeds Beckett University (Ref 27387). An audit of  
36  
37 dementia education and training in England was conducted in 2017 to establish if current training  
38  
39 programmes met the learning outcomes set out by Health Education England's Dementia  
40  
41 Training Standards Framework. The findings of the audit are described by Smith et al [22]. In  
42  
43 total 614 respondents (Care Providers, Training providers and Commissioners) reported on 382  
44  
45 training packages in the audit, 183 respondents reported one or more packages that met the  
46  
47 criteria for being a package of interest. These 183 respondents were asked to circulate an invite  
48  
49 to an online staff survey measuring knowledge, attitudes and confidence, to all participants that  
50  
51 had completed the training package(s) of interest they had reported. The survey was administered  
52  
53  
54  
55  
56  
57  
58  
59  
60



1 using a web based tool, SNAP (see <https://www.snapsurveys.com/>), which enables surveys to be  
2 individualised, which allowed the names of the specific packages of interest to be added to the  
3 survey distributed by each audit respondent. The survey was promoted by including university  
4 and Health Education England logos on the invite and survey, clearly defined completion times,  
5 follow up emails, and an offer of a prize draw entry.  
6  
7  
8  
9  
10  
11  
12

### 13 *Participants:*

14 All health and social care staff who had completed one of the training packages of interest in the  
15 past five years and who were still contactable by the audit respondents, were approached to  
16 participate. Survey participants were required to be 18 years or over, and be able to read and  
17 write in English. No other eligibility criteria were applied.  
18  
19  
20  
21  
22  
23  
24

### 25 *Measures:*

26 The survey comprised of questions concerning:  
27  
28  
29

- 30 • Staff characteristics (gender, age, ethnicity, length in role, job role).
  - 31 • Reaction to each training course completed, measured on a five-point Likert Scale (one =  
32 strongly disagree to five = strongly agree), with a high score indicating a positive  
33 reaction.  
34  
35  
36  
37  
38  
39  
40  
41  
42  
43  
44  
45  
46  
47  
48  
49  
50
1. Satisfaction (How satisfied were you with the training you received?)
  2. Relevance (How relevant was the training to your role/training needs?)
  3. Understanding (How easy was the material to understand?)
  4. Recommendation (How likely are you to recommend the training to colleagues?)

51 Measures of staff knowledge, attitudes and confidence were selected on the basis on the scales  
52 validity and reliability.  
53  
54  
55  
56  
57  
58  
59  
60

- 1  
2 • Knowledge in dementia scale.[23] This measure of knowledge about dementia contains  
3  
4 16 items which respondents categorise as True, False, or Don't know (scored as 0.5). The  
5  
6 scale has been demonstrated to have satisfactory internal reliability with Cronbach alpha  
7  
8 of 0.72 reported. Possible scores range from 0-21.  
9
- 10  
11 • The Dementia Attitudes Scale. [24] This attitude scale consists of two subscales:  
12  
13 dementia knowledge (e.g. people with dementia can enjoy life) and comfort (e.g. I feel  
14  
15 confident around people with dementia), each containing 10 items. Both subscales have  
16  
17 been reported to have good internal reliability with Cronbach alphas reported as 0.83 and  
18  
19 0.85 respectively. The items are rated on a seven-point Likert scale. Possible scores range  
20  
21 from 10-70 for each subscale.  
22  
23
- 24 • The Confidence in Dementia Scale. [23] This is a nine item scale assessing staff  
25  
26 confidence in providing care to people with dementia. The items are measured on a five-  
27  
28 point Likert scale and have been found to demonstrate excellent internal reliability with a  
29  
30 Cronbach alpha of 0.9. Possible scores range from nine to 45.  
31  
32  
33  
34

#### 35 *Data analysis:*

36  
37 SPSSv22 was used to analyse all quantitative data. Descriptive statistics were produced for  
38  
39 demographic data and staff outcomes of knowledge, attitudes and confidence. Hierarchical  
40  
41 regression analysis was performed to examine the amount of variance in staff outcomes  
42  
43 explained by contextual factors and training. Dummy variables were created for categorical  
44  
45 variables (such as staff role) before being entered into the regression model. Where there were  
46  
47 adequate numbers of responses in relation to training packages, these packages were included in  
48  
49 the regression analyses. The training packages were re-categorised and new variables created  
50  
51 based on number of learning outcomes, number of subjects, tier level (1-3) and whether the  
52  
53 training covered specific subjects. Of the 14 different subject areas included in the Framework,  
54  
55  
56  
57  
58  
59

1  
2 only one (pharmacological interventions), was not covered by at least one of the included  
3  
4 training packages. A sample size estimation was calculated using recommendations by  
5  
6 Tabachnick and Fidel [25] which state the formula  $50 + 8m$  whereby  $m$  is the number of  
7  
8 independent variables. A total of 36 independent variables were created suggesting a sample size  
9  
10 of 338 would be sufficient for hierarchical regression. Preliminary analysis was conducted to  
11  
12 ensure no violation of the assumptions of normality, linearity, multi-collinearity, and  
13  
14 homoscedasticity. The variables were entered into the hierarchical regression model in the  
15  
16 following three steps:  
17  
18

19  
20 Step 1: Staff characteristics including, gender, age, ethnicity, staff role and length of time in role.  
21

22 Step 2: Pedagogical variables including duration of training, mode of delivery, when completed,  
23  
24 where completed and number of training courses completed.  
25

26  
27 Step 3: Content variables including training tier, number of learning outcomes, number of  
28  
29 subjects, and subject areas covered.  
30

### 31 *Patient and Public Involvement:*

32  
33  
34

35 Patient and public involvement (PPI) was an important aspect of this study and considered to be  
36  
37 experts by experience [26] and were involved from the conception and design of the study to  
38  
39 dissemination of the outcomes. The core PPI group consisted of three people living with  
40  
41 dementia and eight family members, and met 15 times over the lifetime of the study. Throughout  
42  
43 the study, as recommended by Mathie et al [27] and Ocloo et al [28] there was a particular  
44  
45 emphasis on the active involvement of experts by experience, particularly in aspects of the  
46  
47 research process which are less frequently seen in PPI, such as design, data collection, and  
48  
49 analysis. Within the work package reported in this article, experts by experience took active part  
50  
51 in the following aspects: designing survey materials, ensuring appropriate language was used,  
52  
53 and interpretation of the findings.  
54  
55  
56  
57  
58  
59

## RESULTS

### *Participants:*

A total of 668 participants who had participated in at least one of the training packages of interest, completed the survey, representing 60 training packages in total. A total of 68 respondents had completed more than one of the training packages included within the survey.

Due to a low response rate for some packages, to permit robust analysis, only packages with ten or more respondents were included in subsequent data analysis. This resulted in 18 dementia education and training packages with a total of 553 respondents being included in the final sample. Approximately 88.4% of the sample identified as female and 94.4% as white British. Further staff characteristics are presented in table 1.

Of the 18 packages included in the analysis, 16 were delivered as face to face, two incorporated e-learning, three included mentoring and two utilised simulation. Six of the packages were categorised as Tier 1, 10 were Tier 2, and two were Tier 3. All packages met at least 75% of learning outcomes set out in the 'Framework'. The most popular subject covered by the training packages was person centred dementia care (15) and communication, interaction, and behaviour in dementia care (15), followed by dementia awareness (11), Living well with dementia and promoting independence (8), Law, ethics and safeguarding (6), Families and carers as partners in dementia care(4), dementia identification, assessment and diagnosis (3), Health and wellbeing in dementia care (3), Equality, diversity and inclusion in dementia care (2), Dementia risk reduction and prevention (1), End of life dementia care (1), Research and evince based dementia care (1), Leadership in transforming dementia care (1), and finally no package focused on the subject of pharmacological interventions in dementia care.

1  
2 As all the training packages were rated as highly satisfactory, easy to understand, highly  
3  
4 relevant and recommendable, reaction data was not further analysed.  
5  
6  
7

8  
9 Insert Table 1 here.  
10

### 11 *Impact of training on staff confidence*

12

13 With regards to staff confidence, scores ranged from 11 to 45 (highest possible score is 45), with  
14 an average score of 35.31 (SD = 7.64). The final hierarchical model ( $F = 4.13, p < .001$ )  
15 accounted for 29% of the variance in staff confidence. Pedagogical factors accounted for 11%,  
16 staff characteristics accounted for 10% of the variance, and content variables accounted for 8%  
17 of the variance in staff confidence. Only staff characteristics were found to significantly  
18 determine variance in staff confidence. Those who were older in age, had more than one year  
19 experience and were either clinical (qualified or non qualified) or management level staff were  
20 more likely to have high levels of staff confidence. Staff confidence hierarchical regression  
21 results are presented in Table 2.  
22  
23  
24  
25  
26  
27  
28  
29  
30  
31  
32  
33

34 Insert Table 2 here.  
35

### 36 *Impact of training on attitudes (knowledge)*

37

38 Participant scores ranged from 12-56 (highest score possible is 70) with regards to the  
39 knowledge subscale from the O'Connor Attitude measure, with an average score of 51.68 (SD =  
40 5.08). The final hierarchical regression model accounted for 22% of the variance in staff  
41 attitudinal knowledge ( $F = 3.80, p < .01$ ). Content variables accounted for 11% of the variance,  
42 pedagogical variables accounted for 8% and staff characteristics accounted for 3% of the  
43 variance in staff attitudinal knowledge. Similar variables accounted for a significant amount of  
44 variance in staff attitudinal knowledge as they did factual knowledge: older age, having more  
45 than two years of experience in role, face to face delivery of training, mentoring, simulation  
46  
47  
48  
49  
50  
51  
52  
53  
54  
55  
56  
57  
58  
59  
60

1 based training, and completion of tier two training. Again, those who had completed health and  
2 wellbeing, and families and carers as partners in dementia care accounted for lower levels of  
3  
4 wellbeing, and families and carers as partners in dementia care accounted for lower levels of  
5  
6 staff attitudinal knowledge. Attitudinal knowledge hierarchical regression results are presented in  
7  
8 Table 3.  
9

10  
11 Insert Table 3 here  
12

### 13 *Impact of dementia training on staff knowledge*

14  
15 The knowledge scores for the overall sample ranged from 7.5 to 16 (out of a potential score of  
16 21) and the average score achieved was 13.80 (SD = 1.86). The final hierarchical model  
17  
18 accounted for 18% of the variance in staff knowledge ( $F = 2.77, p < .01$ ). That is only 18% of  
19  
20 staff knowledge is accounted for by the variables entered into the model. Content variables  
21  
22 accounted for 8%, staff characteristics accounted for 6% of the variance, pedagogical variables  
23  
24 accounted for 4% of the variance in staff knowledge. An examination of the co-efficients  
25  
26 suggests older age and having more than two years of experience in role were variables that  
27  
28 accounted for a significant amount of variance in staff knowledge. Having completed either face  
29  
30 to face delivery of training, e-learning, or simulation based training, training which covered a  
31  
32 higher number of learning outcomes across the Framework, and completion of tier one training  
33  
34 had a larger impact on staff knowledge. Interestingly those who had only completed subjects  
35  
36 covering health and wellbeing, and families and carers as partners in dementia care had lower  
37  
38 levels of staff knowledge. Those who had completed leadership subjects in addition to other  
39  
40 subjects demonstrated higher levels of knowledge. Knowledge hierarchical regression results are  
41  
42 presented in Table 4.  
43  
44  
45  
46  
47  
48  
49

50  
51 Insert Table 4 here  
52

### 53 *Impact of training on attitudes (staff comfort)*

1  
2 Attitude (with regards to comfort levels) scores ranged from 12-56 (highest possible  
3  
4 score is 70) with an average score of 51.51 (SD = 5.08). The final hierarchical regression model  
5  
6 (F = 2.11, p < .01) accounted for 14% of the variance in how comfortable staff perceived  
7  
8 themselves to be in delivering dementia care. Pedagogical variables accounted for 7%, content  
9  
10 variables accounted for 4% of the variance and staff characteristic accounted for 3% of the  
11  
12 variance in staff comfort levels. Significant determinants of staff comfort included: ethnicity  
13  
14 (being white British), face to face delivery of training, e learning, number of courses attended,  
15  
16 and completion of tier three training. Those who had completed health and wellbeing training  
17  
18 again had lower levels of comfort, however, those who had completed equality and diversity  
19  
20 training were found to have higher levels of comfort. Attitude (comfort) hierarchical regression  
21  
22 results are presented in Table 5.  
23  
24  
25  
26

27 Insert table 5 here.  
28  
29  
30  
31  
32  
33

## 34 DISCUSSION 35

36 The purpose of this study was to establish the impact of dementia education and training  
37  
38 on the knowledge, attitudes and confidence of health and social care staff. The findings suggest  
39  
40 that dementia education and training in general has limited impact on the knowledge, attitudes  
41  
42 and confidence of health and social care staff. Although the final regression models including  
43  
44 staff characteristics, pedagogical factors and training content variables were statistically  
45  
46 significant, they accounted for less than 30% of the variance in staff outcomes, suggesting other  
47  
48 factors beyond dementia education and training have greater impact on staff knowledge, attitudes  
49  
50 and confidence.  
51  
52  
53  
54  
55  
56  
57  
58  
59  
60

1  
2 The final models indicated that experience was an important influencing factor, with  
3  
4 older staff age and longer time in role, being important determinants of staff knowledge, attitudes  
5  
6 and confidence. With regards to pedagogical factors, training courses that made use of face to  
7  
8 face teaching, with a combination of simulation based learning or e learning, were the most  
9  
10 likely to have an impact on staff outcomes. Training content was found to have limited impact on  
11  
12 staff outcomes. Completion of tier one dementia education and training was most impactful for  
13  
14 staff knowledge as measured by the KIDE [23], tier two training was most impactful on staff  
15  
16 attitudes and tier three was associated with greater staff confidence. This suggests the 'Tiers' are  
17  
18 fulfilling their goals with higher learning leading to reflection, attitudinal change and confidence.  
19  
20 It is also an important finding in that it indicates that if health and social care staff are to have the  
21  
22 right knowledge, attitudes and confidence to deliver good dementia care they need to be  
23  
24 provided with training at higher Tiers than just Tier 1 dementia awareness. The results also  
25  
26 suggest that whilst training content variables are important when attempting to improve staff  
27  
28 knowledge, more consideration should be given to pedagogical factors when training is aiming to  
29  
30 improve staff attitude and confidence.  
31  
32  
33  
34  
35

36 Smith et al. [22] report that approximately 70% of dementia education and training  
37  
38 programmes they audited met only the Tier one learning outcomes as set out by Dementia Core  
39  
40 Skills Framework [9], and less than 40% met the requirements for Tier two and Tier three. The  
41  
42 findings from the current study suggest that Tier 2 and Tier 3 training is required to develop a  
43  
44 dementia care workforce that fosters positive attitudes and is confident in providing high quality  
45  
46 dementia care. However, this may also be confounded by experience and contact with people  
47  
48 living with dementia. That is the positive attitude and confidence may be due to experience as  
49  
50 opposed to the level of training.  
51  
52  
53  
54  
55  
56  
57  
58  
59  
60



1  
2 The findings of this study echo findings of previous studies reporting some positive but  
3  
4 limited impact of dementia education and training on staff outcomes [10-17]. However much  
5  
6 past research has focused on specific training programmes with an emphasis on the content of  
7  
8 the training programme. Whilst the current results suggest that there was a limited impact on  
9  
10 staff outcomes as a result of training, this may be due to the included training programmes being  
11  
12 primarily focused on learning outcomes and subjects rather than on pedagogical factors. The  
13  
14 results suggest that for training to be impactful beyond staff knowledge development,  
15  
16 pedagogical factors, such as mode of delivery, need to be considered. The results demonstrate  
17  
18 that the most impactful training programmes were those that were delivered face to face with  
19  
20 some form of simulation based learning, mentoring and or e-learning. These findings are in-line  
21  
22 with those reported by Surr et al. [21] in their systematic review. The review highlighted that the  
23  
24 most effective dementia education and training packages were those that were delivered face to  
25  
26 face by an experienced trainer, included practice based learning underpinned by theory and clear  
27  
28 guidelines for clinical practice. The review highlighted the difficulty of establishing a single  
29  
30 effective training programme for a diverse care workforce. We echo those observations as the  
31  
32 current findings suggest that diverse pedagogical and subject content factors were of importance  
33  
34 for staff at varying levels of experience.  
35  
36  
37  
38  
39  
40

41 Likewise, it is also important to note that there are a range of other factors that appear to be more  
42  
43 influential than training in ensuring provision of person-centred dementia care. These include  
44  
45 organisation and individual level factors [29] including the organisational climate and support for  
46  
47 delivery of good quality care [30-32] alongside individual staff feelings of stress, burnout [30]  
48  
49 and desire to deliver person-centred care. [33]. This indicates that training needs to be part of an  
50  
51 overall organisational strategy that seeks to ensure individual staff are supported within a  
52  
53  
54  
55  
56  
57  
58  
59  
60

1  
2 positive organisational climate conducive to delivery of person-centred dementia care. Used  
3  
4 alone it is unlikely to have an impact on care quality or outcomes for people with dementia.  
5

6 The findings of the current study should be interpreted with caution. The main limitation of  
7  
8 the study is the homogenous staff sample who were mainly older, white British women, who had  
9  
10 worked in clinical roles for over 10 years. This limits the generalisability of the findings to the  
11  
12 dementia care workforce, who are considered to be heterogeneous. The survey had a low  
13  
14 response rate which may have been due to organisations not being able to reach relevant staff,  
15  
16 due to staff either moving away or the organisation not keeping a record of who had completed  
17  
18 the training. The survey was only available in the English language and was also reported to be  
19  
20 lengthy to complete, potentially further limiting responses from participants from diverse  
21  
22 backgrounds. The survey utilised measures that had previously been used within specific settings  
23  
24 such as acute care. This may have had an impact on the results but it is worth noting that the  
25  
26 measures continued to demonstrate good reliability despite being used in diverse settings.  
27  
28 Furthermore, the design of the study limited the possibilities of controlling for all possible  
29  
30 confounding factors, due to a small sample size and a large number of independent variables. It  
31  
32 was not possible to explore interactional effects via structural equation modelling or multi-level  
33  
34 modelling due to the limited sample of respondents. Findings related to impact on staff  
35  
36 confidence should also be interpreted with caution as a ceiling effect was observed. A further  
37  
38 limitation is that we were unable to obtain collection of outcome data pre- and post-training and  
39  
40 therefore, it is not possible to determine whether staff knowledge, attitudes and skills were a  
41  
42 direct result of attendance at the reported dementia education or training programme.  
43  
44  
45  
46  
47  
48  
49

50 Despite the above limitations, a large enough sample of staff was recruited to explore the  
51  
52 impact of training and the features of impactful training. The findings have clear implications  
53  
54 for all health and social care staff who are required to undergo some form of dementia education  
55  
56  
57  
58  
59  
60

1  
2 and training. The study also has implications for policy makers and training commissioners. It is  
3  
4 a requirement of the National Dementia Strategy [6] to develop an informed dementia care  
5  
6 workforce. This study suggests that training providers and commissioners need to move beyond  
7  
8 subject learning outcomes and also consider pedagogical factors and depth of education to have a  
9  
10 truly significant impact on staff attitudes and confidence. Further research is required to establish  
11  
12 the specific needs of distinct health and social care staff for example the training needs of  
13  
14 working in acute hospital care will differ from those working in care home settings. A targeted  
15  
16 approach is required whereby health care professionals have access to strong Tier 2 and Tier 3  
17  
18 training which is relevant to their role.  
19  
20  
21  
22  
23  
24

25 The findings of this study suggest that currently dementia education and training has some  
26  
27 limited impact on the knowledge, attitudes and confidence of health and social care staff. The  
28  
29 pedagogical factors of training such as mode of delivery are important in ensuring training is  
30  
31 effective in changing attitudes and confidence as well as staff knowledge. Dementia education  
32  
33 and training providers/commissioners should consider staff characteristics and pedagogical  
34  
35 factors as well as subject content when providing dementia education and training to the  
36  
37 dementia care workforce.  
38  
39  
40  
41  
42  
43  
44  
45  
46  
47  
48  
49  
50  
51  
52  
53  
54  
55  
56  
57  
58  
59  
60

## REFERENCES

- [1] Alzheimer's Disease International. Dementia: A Public Health Priority. London: WHO; 2012. [https://www.who.int/mental\\_health/publications/dementia\\_report\\_2012/en/](https://www.who.int/mental_health/publications/dementia_report_2012/en/).
- [2] Alzheimer's Disease International. World Alzheimer Report. The state of the art dementia research; New frontiers. London, 2018. <https://www.alz.co.uk/news/world-alzheimer-report2018-state-of-art-of-dementia-research-newfrontiers>.
- [3] Alzheimer's Society. Counting the cost. Caring for people with dementia on hospital wards. London: Alzheimer's Society; 2009. [https://www.alzheimers.org.uk/sites/default/files/2018-05/Counting\\_the\\_cost\\_report.pdf](https://www.alzheimers.org.uk/sites/default/files/2018-05/Counting_the_cost_report.pdf).
- [4] Prince M, Knapp M, Guerchet M, et al. Dementia UK: report to the Alzheimer's society. London: Alzheimer's Society; 2014. [https://www.alzheimers.org.uk/sites/default/files/migrate/downloads/dementia\\_uk\\_update.pdf](https://www.alzheimers.org.uk/sites/default/files/migrate/downloads/dementia_uk_update.pdf).
- [5] Becker, M.A., Boaz, T.L., Andel, R., Gum, A.M. and Papadopoulos, A.S., 2010. Predictors of preventable nursing home hospitalizations: the role of mental disorders and dementia. *The American Journal of Geriatric Psychiatry*, 18(6), pp.475-482.
- [6] Department of Health, Living well with dementia: A National Dementia Strategy. 2009, Department of Health: London.
- [7] Department of Health, Prime Minister's challenge on dementia. delivering major improvements in dementia care and research by 2015. 2012, Department of Health: London
- [8] Department of Health, Prime Minister's challenge on dementia 2020. 2015, Department of Health: London
- [9] Skills for Health, Health Education England, Skills for Care. Dementia Core Skills Education and Training Framework Skills for Health, London; 2015. [https://www.housinglin.org.uk/\\_assets/Resources/Housing/OtherOrganisation/Dementia\\_Core\\_Skills\\_Education\\_and\\_Training\\_Framework.pdf](https://www.housinglin.org.uk/_assets/Resources/Housing/OtherOrganisation/Dementia_Core_Skills_Education_and_Training_Framework.pdf).

- 1  
2 [10] Liu JY, Lai C, Dai D, et al. Attitudes in the management of patients with dementia:  
3 comparison in doctors with and without special training. *East Asian archives of psychiatry*. 2013  
4 Mar;23(1):13.  
5
- 6 [11] Spector A, Orrell M, Goyder J. A systematic review of staff training interventions to reduce  
7 the behavioural and psychological symptoms of dementia. *Ageing research reviews*. 2013 Jan  
8 1;12(1):354-64.  
9
- 10 [12] Galvin JE, Meuser TM, Morris JC. Improving physician awareness of Alzheimer's disease  
11 and enhancing recruitment: the Clinician Partners Program. *Alzheimer disease and associated*  
12 *disorders*. 2012 Jan;26(1):61.  
13
- 14 [13] Jennings, A., McLoughlin, K., Boyle, S., Thackeray, K., Quinn, A., O'Sullivan, T. and  
15 Foley, T., 2019. Development and evaluation of a primary care interprofessional education  
16 intervention to support people with dementia. *Journal of interprofessional Care*, 33(5), pp.579-  
17 582.  
18
- 19 [14] Jack-Waugh, A., Ritchie, L., & MacRae, R. (2018). Assessing the educational impact of the  
20 dementia champions programme in Scotland: Implications for evaluating professional dementia  
21 education. *Nurse education today*, 71, 205-210.  
22
- 23 [15] Wang, Y., Xiao, L.D., Ullah, S., He, G.P. and De Bellis, A., 2017. Evaluation of a nurse-led  
24 dementia education and knowledge translation programme in primary care: A cluster randomized  
25 controlled trial. *Nurse education today*, 49, pp.1-7.  
26
- 27 [16] O'Brien, R., Goldberg, S.E., Pilnick, A., Beeke, S., Schneider, J., Sartain, K., Thomson, L.,  
28 Murray, M., Baxendale, B. and Harwood, R.H., 2018. The VOICE study—A before and after  
29 study of a dementia communication skills training course. *PloS one*, 13(6), p.e0198567.  
30
- 31 [17] Rokstad, A.M.M., Døble, B.S., Engedal, K., Kirkevold, Ø., Benth, J.Š. and Selbæk, G.,  
32 2017. The impact of the Dementia ABC educational programme on competence in  
33 person-centred dementia care and job satisfaction of care staff. *International Journal of Older*  
34 *People Nursing*, 12(2), p.e12139.  
35
- 36 [18] Beer C, Horner B, Flicker L, et al. A cluster-randomised trial of staff education to improve  
37 the quality of life of people with dementia living in residential care: the DIRECT study. *PloS*  
38 *one*. 2011;6(11).  
39
- 40 [19] Beer LE, Hutchinson SR, Skala-Cordes KK. Communicating with patients who have  
41 advanced dementia: training nurse aide students. *Gerontology & geriatrics education*. 2012 Oct  
42 1;33(4):402-20.  
43
- 44 [20] Visser SM, McCabe MP, Hudgson C, et al. Managing behavioural symptoms of dementia:  
45 effectiveness of staff education and peer support. *Aging and Mental Health*. 2008 Jan 1;12(1):47-  
46 55.  
47  
48  
49  
50  
51  
52  
53  
54  
55  
56  
57  
58  
59  
60

- 1  
2 [21] Surr CA, Gates C, Irving D, et al. Effective dementia education and training for the health  
3 and social care workforce: a systematic review of the literature. *Review of educational research*.  
4 2017 Oct;87(5):966-1002.  
5
- 6 [22] Smith SJ, Parveen S, Sass C, et al. An audit of dementia education and training in UK health  
7 and social care: a comparison with national benchmark standards. *BMC health services research*.  
8 2019 Dec 1;19(1):711.  
9
- 10  
11 [23] Elvish R, Burrow S, Cawley R, et al. 'Getting to Know Me': The second phase roll-out of a  
12 staff training programme for supporting people with dementia in general hospitals. *Dementia*.  
13 2018 Jan;17(1):96-109.  
14
- 15  
16 [24] O'Connor ML, McFadden SH. Development and psychometric validation of the Dementia  
17 Attitudes Scale. *International Journal of Alzheimer's Disease*. 2010;2010.  
18
- 19 [25] Tabachnick BG, Fidell LS, Ullman JB. Using multivariate statistics. Boston, MA: Pearson;  
20 2007 Mar 3.  
21
- 22 [26] Katz A. A council of elders: creating a multi-voiced dialogue in a community of  
23 care. *Social Science and Medicine*. 2000; 50: 851-860.  
24
- 25  
26 [27] Mathie E, Wilson P, Poland F, McNeilly E, Howe A, Staniszewska S, Cowe M, Munday D,  
27 Goodman C. Consumer involvement in health research: a UK scoping and survey. *International*  
28 *Journal of Consumer Studies*, 2014; 1: 35-44.  
29
- 30  
31 [28] Ocloo J, Matthews R. From tokenism to empowerment: progressing patient and public  
32 involvement in healthcare improvement. *BMJ Quality and Safety*. 2016; 8: 626-632.  
33
- 34 [29] Hunter, P.V., Hadjistavropoulos, T., Thorpe, L., Lix, L.M. and Malloy, D.C., 2016. The  
35 influence of individual and organizational factors on person-centred dementia care. *Aging &*  
36 *mental health*, 20(7), pp.700-708.  
37
- 38  
39 [30] McCabe, M.P., Mellor, D., Karantzas, G., Von Treuer, K., Davison, T.E. and O'Connor, D.,  
40 2017. Organizational factors related to the confidence of workers in working with residents with  
41 dementia or depression in aged care facilities. *Aging & Mental Health*, 21(5), pp.487-493.  
42
- 43 [31] Hughes, J., Bagley, H., Reilly, S., Burns, A. and Challis, D., 2008. Care staff working with  
44 people with dementia: training, knowledge and confidence. *Dementia*, 7(2), pp.227-238.  
45
- 46  
47 [32] Rivett, E., Hammond, L. and West, J., 2019. What influences self-perceived competence  
48 and confidence in dementia care home staff? A systematic review. *Psychogeriatrics*, 19(5),  
49 pp.440-456.  
50
- 51 [33] Mullan, M.A. and Sullivan, K.A., 2016. Positive attitudes and person-centred care predict of  
52 sense of competence in dementia care staff. *Aging & mental health*, 20(4), pp.407-414.  
53  
54  
55  
56  
57  
58  
59  
60

1  
2  
3  
4  
5  
6  
7  
8  
9  
10  
11  
12  
13  
14  
15  
16  
17  
18  
19  
20  
21  
22  
23  
24  
25  
26  
27  
28  
29  
30  
31  
32  
33  
34  
35  
36  
37  
38  
39  
40  
41  
42  
43  
44  
45  
46  
47  
48  
49  
50  
51  
52  
53  
54  
55  
56  
57  
58  
59  
60

For peer review only

Table 1. Demographic characteristics of health and social care staff included in the study

| Characteristic | Sub Characteristic        | N   | Percentage |
|----------------|---------------------------|-----|------------|
| Gender         | Male                      | 63  | 11.39      |
|                | Female                    | 489 | 88.4       |
| Ethnicity      | White British             | 552 | 94.4       |
|                | Pakistani                 | 2   | 0.4        |
|                | Indian                    | 5   | 0.9        |
|                | Black African/Caribbean   | 6   | 1.1        |
|                | Mixed ethnicity           | 7   | 1.3        |
|                | Arab                      | 1   | 0.2        |
|                | Not stated                | 4   | 0.7        |
| Age            | 18-24 years               | 27  | 4.9        |
|                | 25-29 years               | 42  | 7.6        |
|                | 30-34 years               | 45  | 8.1        |
|                | 35-39 years               | 55  | 9.9        |
|                | 40-44 years               | 60  | 10.8       |
|                | 45-49 years               | 89  | 16.1       |
|                | 50-54 years               | 102 | 18.4       |
|                | 55-59 years               | 87  | 15.7       |
|                | 60-64 years               | 29  | 5.2        |
|                | 65 years and over         | 15  | 2.7        |
| Role           | Ancillary/clerical        | 39  | 7.1        |
|                | Unqualified clinical/care | 108 | 19.5       |
|                | Qualified clinical        | 194 | 35.1       |
|                | Unit/facility manager     | 26  | 4.7        |
|                | Senior manager            | 65  | 11.8       |
| Time in role   | Other                     | 121 | 21.9       |
|                | Less than 1 years         | 15  | 2.7        |
|                | 1-2 years                 | 45  | 8.1        |
|                | 3-4 years                 | 50  | 9          |
|                | 5-9 years                 | 94  | 17         |
|                | 10-19 years               | 141 | 25.5       |
|                | 20 and over years         | 197 | 35.6       |



Table 2. Summary of hierarchical regression to establish impact of staff characteristics, training content and pedagogical factors on staff confidence.

| <b>Variables</b>            | <b>B</b> | <b>SE</b> | <b>Beta<br/>(Standardised)</b> | <b>P value</b> |
|-----------------------------|----------|-----------|--------------------------------|----------------|
| Female                      | 1.588    | .974      | .068                           | .104           |
| Age                         | -.405    | .157      | -.124                          | .010           |
| Ethnicity (white British)   | -.068    | .195      | -.014                          | .729           |
| Less than 1 year experience | -3.991   | 1.965     | -.089                          | .043           |
| 1-2 years                   | -1.906   | 1.340     | -.071                          | .156           |
| 3-4 year                    | -2.027   | 1.270     | -.078                          | .111           |
| 5-9 years                   | -.533    | .999      | -.027                          | .594           |
| 10 plus years               | -.213    | .842      | -.012                          | .801           |
| Role: Ancillary             | -3.823   | 1.349     | -.133                          | .005           |
| Role: Clinical              | .852     | .934      | .045                           | .362           |
| Role: Manager               | 1.606    | 1.569     | .044                           | .307           |
| Role: Senior manager        | -.209    | 1.121     | -.009                          | .853           |
| Role: Other                 | -2.317   | .953      | -.127                          | .015           |
| Course length               | .012     | .029      | .021                           | .688           |
| Face to face learning       | 1.547    | 8.071     | .049                           | .848           |
| E learning                  | 4.581    | 4.626     | .144                           | .323           |
| Mentoring                   | 1.861    | 1.578     | .105                           | .239           |
| Simulation                  | 4.508    | 3.418     | .290                           | .188           |
| Completion: 1-2 years ago   | .416     | .714      | .026                           | .560           |
| More than 3 years ago       | -.442    | 1.350     | -.014                          | .743           |
| Number of courses           | .860     | .863      | .056                           | .319           |
| Number of learning outcomes | .015     | 1.165     | .001                           | .990           |
| Number of subjects          | .113     | .127      | .381                           | .371           |
| Tier                        | -1.617   | 2.326     | -.381                          | .487           |
| Awareness                   | -1.465   | 4.775     | -.099                          | .759           |
| Diagnosis                   | -.151    | 6.105     | -.010                          | .980           |
| Communication               | 4.147    | 7.355     | .153                           | .573           |
| Health and wellbeing        | .158     | 2.956     | .006                           | .957           |
| Living well with dementia   | -2.670   | 4.961     | -.101                          | .591           |
| Families                    | .437     | 7.181     | .028                           | .951           |
| Equality                    | -6.774   | 4.572     | -.289                          | .139           |
| Law                         | 5.218    | 8.768     | .131                           | .552           |
| Leadership                  | .972     | 2.726     | .048                           | .722           |

Table 3. Summary of hierarchical regression to establish impact of staff characteristics, training content and pedagogical factors on staff knowledge (attitude sub-scale).

| Variables                   | B       | SE    | Beta (Standardised) | P value |
|-----------------------------|---------|-------|---------------------|---------|
| Female                      | 1.047   | .705  | .065                | .138    |
| Age                         | -.236   | .114  | -.105               | .038    |
| Ethnicity (white British)   | -.024   | .141  | -.007               | .866    |
| Less than 1 year experience | -3.637  | 1.421 | -.117               | .011    |
| 1-2 years                   | -2.010  | .970  | -.108               | .039    |
| 3-4 year                    | -.871   | .919  | -.048               | .344    |
| 5-9 years                   | -.337   | .723  | -.024               | .641    |
| 10 plus years               | -1.008  | .609  | -.084               | .099    |
| Role: Ancillary             | .926    | .976  | .047                | .343    |
| Role: Clinical              | .556    | .675  | .042                | .411    |
| Role: Manager               | 1.391   | 1.135 | .056                | .221    |
| Role: Senior manager        | .121    | .811  | .008                | .881    |
| Role: Other                 | -.701   | .690  | -.055               | .310    |
| Course length               | -.014   | .021  | -.037               | .505    |
| Face to face learning       | 12.535  | 5.837 | .570                | .032    |
| E learning                  | 1.667   | 3.346 | .076                | .619    |
| Mentoring                   | 3.293   | 1.141 | .269                | .004    |
| Simulation                  | 12.247  | 2.472 | 1.139               | .000    |
| Completion: 1-2 years ago   | -.587   | .517  | -.052               | .257    |
| More than 3 years ago       | .353    | .976  | .017                | .718    |
| Number of courses           | .869    | .624  | .082                | .165    |
| Number of learning outcomes | -.131   | .842  | -.011               | .876    |
| Number of subjects          | .115    | .092  | .558                | .211    |
| Tier                        | -1.078  | 1.682 | -.367               | .522    |
| Awareness                   | -8.951  | 3.454 | -.877               | .010    |
| Diagnosis                   | 4.185   | 4.416 | .395                | .344    |
| Communication               | 8.549   | 5.319 | .456                | .109    |
| Health and wellbeing        | -2.785  | 2.138 | -.162               | .193    |
| Living well with dementia   | -13.959 | 3.588 | -.761               | .000    |
| Families                    | 3.542   | 5.194 | .332                | .496    |
| Equality                    | -10.931 | 3.307 | -.675               | .001    |
| Law                         | -2.710  | 6.342 | -.098               | .669    |
| Leadership                  | 2.341   | 1.971 | .166                | .236    |

Table 4. Summary of hierarchical regression to establish impact of staff characteristics, training content and pedagogical factors on staff knowledge.

| Variables                   | B      | SE    | Beta (Standardised) | P value |
|-----------------------------|--------|-------|---------------------|---------|
| Female                      | .368   | .262  | .063                | .161    |
| Age                         | -.125  | .042  | -.154               | .003    |
| Ethnicity (white British)   | -.011  | .052  | -.009               | .839    |
| Less than 1 year experience | -1.147 | .528  | -.102               | .030    |
| 1-2 years                   | -1.272 | .360  | -.190               | .000    |
| 3-4 year                    | -.174  | .341  | -.027               | .610    |
| 5-9 years                   | -.472  | .269  | -.095               | .079    |
| 10 plus years               | -.534  | .226  | -.124               | .019    |
| Role: Ancillary             | .031   | .363  | .004                | .932    |
| Role: Clinical              | .099   | .251  | .021                | .692    |
| Role: Manager               | .391   | .422  | .043                | .354    |
| Role: Senior manager        | .053   | .301  | .009                | .860    |
| Role: Other                 | -.209  | .256  | -.046               | .416    |
| Course length               | .002   | .008  | .016                | .779    |
| Face to face learning       | -5.640 | 2.169 | -.712               | .010    |
| E learning                  | 2.489  | 1.243 | .314                | .046    |
| Mentoring                   | -.056  | .424  | -.013               | .896    |
| Simulation                  | 3.461  | .919  | .893                | .000    |
| Completion: 1-2 years ago   | -.118  | .192  | -.029               | .540    |
| More than 3 years ago       | .567   | .363  | .074                | .119    |
| Number of courses           | -.151  | .232  | -.040               | .514    |
| Number of learning outcomes | .003   | .313  | .001                | .991    |
| Number of subjects          | .071   | .034  | .956                | .038    |
| Tier                        | -.984  | .625  | -.930               | .116    |
| Awareness                   | -4.377 | 1.283 | -1.190              | .001    |
| Diagnosis                   | 2.493  | 1.641 | .653                | .129    |
| Communication               | -.510  | 1.977 | -.076               | .796    |
| Health and wellbeing        | .651   | .794  | .105                | .413    |
| Living well with dementia   | -4.510 | 1.333 | -.682               | .001    |
| Families                    | 2.932  | 1.930 | .763                | .129    |
| Equality                    | -2.896 | 1.229 | -.496               | .019    |
| Law                         | -4.350 | 2.356 | -.438               | .066    |
| Leadership                  | 1.205  | .733  | .237                | .101    |

Table 5. Summary of hierarchical regression to establish impact of staff characteristics, training content and pedagogical factors on staff comfort (attitude sub-scale).

| Variables                   | B       | SE    | Beta (Standardised) | P value |
|-----------------------------|---------|-------|---------------------|---------|
| Female                      | -.792   | .810  | -.045               | .328    |
| Age                         | .017    | .130  | .007                | .896    |
| Ethnicity (white British)   | .369    | .162  | .105                | .023    |
| Less than 1 year experience | 1.368   | 1.632 | .040                | .403    |
| 1-2 years                   | -.289   | 1.114 | -.014               | .795    |
| 3-4 year                    | -.920   | 1.055 | -.047               | .384    |
| 5-9 years                   | -.031   | .830  | -.002               | .970    |
| 10 plus years               | -.572   | .700  | -.044               | .414    |
| Role: Ancillary             | -.160   | 1.121 | -.007               | .887    |
| Role: Clinical              | -.305   | .776  | -.021               | .694    |
| Role: Manager               | -1.040  | 1.304 | -.038               | .425    |
| Role: Senior manager        | -.544   | .932  | -.031               | .560    |
| Role: Other                 | .822    | .792  | .060                | .300    |
| Course length               | -.007   | .024  | -.016               | .779    |
| Face to face learning       | -16.595 | 6.706 | -.693               | .014    |
| E learning                  | -7.606  | 3.844 | -.317               | .048    |
| Mentoring                   | 1.597   | 1.311 | .120                | .224    |
| Simulation                  | -3.883  | 2.840 | -.331               | .172    |
| Completion: 1-2 years ago   | .790    | .593  | .064                | .184    |
| More than 3 years ago       | .000    | 1.122 | .000                | 1.000   |
| Number of courses           | -1.111  | .717  | -.096               | .122    |
| Number of learning outcomes | 2.333   | .968  | .186                | .016    |
| Number of subjects          | -.165   | .105  | -.736               | .118    |
| Tier                        | 2.107   | 1.932 | .659                | .276    |
| Awareness                   | 10.642  | 3.968 | .957                | .008    |
| Diagnosis                   | -4.585  | 5.073 | -.397               | .367    |
| Communication               | 6.454   | 6.111 | .316                | .291    |
| Health and wellbeing        | -3.009  | 2.456 | -.161               | .221    |
| Living well with dementia   | 11.148  | 4.122 | .558                | .007    |
| Families                    | -8.726  | 5.967 | -.751               | .144    |
| Equality                    | .868    | 3.799 | .049                | .819    |
| Law                         | 15.096  | 7.286 | .502                | .039    |
| Leadership                  | -2.011  | 2.265 | -.131               | .375    |

# Reporting checklist for cross sectional study.

Based on the STROBE cross sectional guidelines.

## Instructions to authors

Complete this checklist by entering the page numbers from your manuscript where readers will find each of the items listed below.

Your article may not currently address all the items on the checklist. Please modify your text to include the missing information. If you are certain that an item does not apply, please write "n/a" and provide a short explanation.

Upload your completed checklist as an extra file when you submit to a journal.

In your methods section, say that you used the STROBE cross sectional reporting guidelines, and cite them as:

von Elm E, Altman DG, Egger M, Pocock SJ, Gøtzsche PC, Vandenbroucke JP. The Strengthening the Reporting of Observational Studies in Epidemiology (STROBE) Statement: guidelines for reporting observational studies.

|                           | Reporting Item                                                                                                      | Page Number |
|---------------------------|---------------------------------------------------------------------------------------------------------------------|-------------|
| <b>Title and abstract</b> |                                                                                                                     |             |
| Title                     | <a href="#">#1a</a> Indicate the study's design with a commonly used term in the title or the abstract              | Page 1      |
| Abstract                  | <a href="#">#1b</a> Provide in the abstract an informative and balanced summary of what was done and what was found | Page 1      |
| <b>Introduction</b>       |                                                                                                                     |             |
| Background / rationale    | <a href="#">#2</a> Explain the scientific background and rationale for the investigation being reported             | Page 3      |
| Objectives                | <a href="#">#3</a> State specific objectives, including any prespecified hypotheses                                 | Page 5      |
| <b>Methods</b>            |                                                                                                                     |             |
| Study design              | <a href="#">#4</a> Present key elements of study design early in the                                                | Page 5      |

paper

|    |                      |                      |                                                               |
|----|----------------------|----------------------|---------------------------------------------------------------|
| 1  |                      |                      |                                                               |
| 2  |                      |                      |                                                               |
| 3  | Setting              | <a href="#">#5</a>   | Describe the setting, locations, and relevant dates, Page 6   |
| 4  |                      |                      | including periods of recruitment, exposure, follow-up,        |
| 5  |                      |                      | and data collection                                           |
| 6  |                      |                      |                                                               |
| 7  |                      |                      |                                                               |
| 8  | Eligibility criteria | <a href="#">#6a</a>  | Give the eligibility criteria, and the sources and Page 6     |
| 9  |                      |                      | methods of selection of participants.                         |
| 10 |                      |                      |                                                               |
| 11 |                      | <a href="#">#7</a>   | Clearly define all outcomes, exposures, predictors, Page 6    |
| 12 |                      |                      | potential confounders, and effect modifiers. Give             |
| 13 |                      |                      | diagnostic criteria, if applicable                            |
| 14 |                      |                      |                                                               |
| 15 |                      |                      |                                                               |
| 16 |                      |                      |                                                               |
| 17 | Data sources /       | <a href="#">#8</a>   | For each variable of interest give sources of data Page 6     |
| 18 | measurement          |                      | and details of methods of assessment                          |
| 19 |                      |                      | (measurement). Describe comparability of                      |
| 20 |                      |                      | assessment methods if there is more than one                  |
| 21 |                      |                      | group. Give information separately for for exposed            |
| 22 |                      |                      | and unexposed groups if applicable.                           |
| 23 |                      |                      |                                                               |
| 24 |                      |                      |                                                               |
| 25 |                      |                      |                                                               |
| 26 |                      |                      |                                                               |
| 27 | Bias                 | <a href="#">#9</a>   | Describe any efforts to address potential sources of Page 7   |
| 28 |                      |                      | bias                                                          |
| 29 |                      |                      |                                                               |
| 30 |                      |                      |                                                               |
| 31 | Study size           | <a href="#">#10</a>  | Explain how the study size was arrived at Page 7              |
| 32 |                      |                      |                                                               |
| 33 | Quantitative         | <a href="#">#11</a>  | Explain how quantitative variables were handled in Page 7     |
| 34 | variables            |                      | the analyses. If applicable, describe which groupings         |
| 35 |                      |                      | were chosen, and why                                          |
| 36 |                      |                      |                                                               |
| 37 |                      |                      |                                                               |
| 38 | Statistical          | <a href="#">#12a</a> | Describe all statistical methods, including those used Page 7 |
| 39 | methods              |                      | to control for confounding                                    |
| 40 |                      |                      |                                                               |
| 41 |                      |                      |                                                               |
| 42 | Statistical          | <a href="#">#12b</a> | Describe any methods used to examine subgroups Page 7         |
| 43 | methods              |                      | and interactions                                              |
| 44 |                      |                      |                                                               |
| 45 |                      |                      |                                                               |
| 46 | Statistical          | <a href="#">#12c</a> | Explain how missing data were addressed Page 7                |
| 47 | methods              |                      |                                                               |
| 48 |                      |                      |                                                               |
| 49 |                      |                      |                                                               |
| 50 | Statistical          | <a href="#">#12d</a> | If applicable, describe analytical methods taking Page 7      |
| 51 | methods              |                      | account of sampling strategy                                  |
| 52 |                      |                      |                                                               |
| 53 |                      |                      |                                                               |
| 54 | Statistical          | <a href="#">#12e</a> | Describe any sensitivity analyses Page 7                      |
| 55 | methods              |                      |                                                               |
| 56 |                      |                      |                                                               |
| 57 | <b>Results</b>       |                      |                                                               |
| 58 |                      |                      |                                                               |
| 59 |                      |                      |                                                               |
| 60 |                      |                      |                                                               |

|    |                  |                      |                                                                                                                                                                                                                                                                                |                    |
|----|------------------|----------------------|--------------------------------------------------------------------------------------------------------------------------------------------------------------------------------------------------------------------------------------------------------------------------------|--------------------|
| 1  | Participants     | <a href="#">#13a</a> | Report numbers of individuals at each stage of study—eg numbers potentially eligible, examined for eligibility, confirmed eligible, included in the study, completing follow-up, and analysed. Give information separately for for exposed and unexposed groups if applicable. |                    |
| 2  |                  |                      |                                                                                                                                                                                                                                                                                |                    |
| 3  |                  |                      |                                                                                                                                                                                                                                                                                |                    |
| 4  |                  |                      |                                                                                                                                                                                                                                                                                |                    |
| 5  |                  |                      |                                                                                                                                                                                                                                                                                |                    |
| 6  |                  |                      |                                                                                                                                                                                                                                                                                |                    |
| 7  |                  |                      |                                                                                                                                                                                                                                                                                |                    |
| 8  |                  |                      |                                                                                                                                                                                                                                                                                |                    |
| 9  |                  |                      |                                                                                                                                                                                                                                                                                |                    |
| 10 | Participants     | <a href="#">#13b</a> | Give reasons for non-participation at each stage                                                                                                                                                                                                                               | NA                 |
| 11 |                  |                      |                                                                                                                                                                                                                                                                                |                    |
| 12 |                  |                      |                                                                                                                                                                                                                                                                                |                    |
| 13 |                  |                      |                                                                                                                                                                                                                                                                                | Reasons for non    |
| 14 |                  |                      |                                                                                                                                                                                                                                                                                | participation were |
| 15 |                  |                      |                                                                                                                                                                                                                                                                                | not collected      |
| 16 |                  |                      |                                                                                                                                                                                                                                                                                |                    |
| 17 |                  |                      |                                                                                                                                                                                                                                                                                |                    |
| 18 | Participants     | <a href="#">#13c</a> | Consider use of a flow diagram                                                                                                                                                                                                                                                 | NA                 |
| 19 |                  |                      |                                                                                                                                                                                                                                                                                |                    |
| 20 |                  |                      |                                                                                                                                                                                                                                                                                |                    |
| 21 | Descriptive data | <a href="#">#14a</a> | Give characteristics of study participants (eg demographic, clinical, social) and information on exposures and potential confounders. Give information separately for exposed and unexposed groups if applicable.                                                              | Page 9             |
| 22 |                  |                      |                                                                                                                                                                                                                                                                                |                    |
| 23 |                  |                      |                                                                                                                                                                                                                                                                                |                    |
| 24 |                  |                      |                                                                                                                                                                                                                                                                                |                    |
| 25 |                  |                      |                                                                                                                                                                                                                                                                                |                    |
| 26 |                  |                      |                                                                                                                                                                                                                                                                                |                    |
| 27 |                  |                      |                                                                                                                                                                                                                                                                                |                    |
| 28 |                  |                      |                                                                                                                                                                                                                                                                                |                    |
| 29 | Descriptive data | <a href="#">#14b</a> | Indicate number of participants with missing data for each variable of interest                                                                                                                                                                                                | Number of          |
| 30 |                  |                      |                                                                                                                                                                                                                                                                                | participants       |
| 31 |                  |                      |                                                                                                                                                                                                                                                                                | included in all    |
| 32 |                  |                      |                                                                                                                                                                                                                                                                                | analysis Page 10   |
| 33 |                  |                      |                                                                                                                                                                                                                                                                                | onwards            |
| 34 |                  |                      |                                                                                                                                                                                                                                                                                |                    |
| 35 |                  |                      |                                                                                                                                                                                                                                                                                |                    |
| 36 |                  |                      |                                                                                                                                                                                                                                                                                |                    |
| 37 | Outcome data     | <a href="#">#15</a>  | Report numbers of outcome events or summary measures. Give information separately for exposed and unexposed groups if applicable.                                                                                                                                              | Page 10            |
| 38 |                  |                      |                                                                                                                                                                                                                                                                                |                    |
| 39 |                  |                      |                                                                                                                                                                                                                                                                                |                    |
| 40 |                  |                      |                                                                                                                                                                                                                                                                                |                    |
| 41 |                  |                      |                                                                                                                                                                                                                                                                                |                    |
| 42 |                  |                      |                                                                                                                                                                                                                                                                                |                    |
| 43 | Main results     | <a href="#">#16a</a> | Give unadjusted estimates and, if applicable, confounder-adjusted estimates and their precision (eg, 95% confidence interval). Make clear which confounders were adjusted for and why they were included                                                                       | Page 10            |
| 44 |                  |                      |                                                                                                                                                                                                                                                                                |                    |
| 45 |                  |                      |                                                                                                                                                                                                                                                                                |                    |
| 46 |                  |                      |                                                                                                                                                                                                                                                                                |                    |
| 47 |                  |                      |                                                                                                                                                                                                                                                                                |                    |
| 48 |                  |                      |                                                                                                                                                                                                                                                                                |                    |
| 49 |                  |                      |                                                                                                                                                                                                                                                                                |                    |
| 50 |                  |                      |                                                                                                                                                                                                                                                                                |                    |
| 51 | Main results     | <a href="#">#16b</a> | Report category boundaries when continuous variables were categorized                                                                                                                                                                                                          | Page 8/9/10        |
| 52 |                  |                      |                                                                                                                                                                                                                                                                                |                    |
| 53 |                  |                      |                                                                                                                                                                                                                                                                                |                    |
| 54 |                  |                      |                                                                                                                                                                                                                                                                                |                    |
| 55 | Main results     | <a href="#">#16c</a> | If relevant, consider translating estimates of relative risk into absolute risk for a meaningful time period                                                                                                                                                                   | NA                 |
| 56 |                  |                      |                                                                                                                                                                                                                                                                                |                    |
| 57 |                  |                      |                                                                                                                                                                                                                                                                                |                    |
| 58 |                  |                      |                                                                                                                                                                                                                                                                                |                    |
| 59 | Other analyses   | <a href="#">#17</a>  | Report other analyses done—e.g., analyses of                                                                                                                                                                                                                                   | NA                 |
| 60 |                  |                      |                                                                                                                                                                                                                                                                                |                    |

subgroups and interactions, and sensitivity analyses

## Discussion

|                          |                     |                                                                                                                                                                  |         |
|--------------------------|---------------------|------------------------------------------------------------------------------------------------------------------------------------------------------------------|---------|
| Key results              | <a href="#">#18</a> | Summarise key results with reference to study objectives                                                                                                         | Page 11 |
| Limitations              | <a href="#">#19</a> | Discuss limitations of the study, taking into account sources of potential bias or imprecision. Discuss both direction and magnitude of any potential bias.      | Page 13 |
| Interpretation           | <a href="#">#20</a> | Give a cautious overall interpretation considering objectives, limitations, multiplicity of analyses, results from similar studies, and other relevant evidence. | Page 13 |
| Generalisability         | <a href="#">#21</a> | Discuss the generalisability (external validity) of the study results                                                                                            | Page 13 |
| <b>Other Information</b> |                     |                                                                                                                                                                  |         |
| Funding                  | <a href="#">#22</a> | Give the source of funding and the role of the funders for the present study and, if applicable, for the original study on which the present article is based    | Page 1  |

None The STROBE checklist is distributed under the terms of the Creative Commons Attribution License CC-BY. This checklist can be completed online using <https://www.goodreports.org/>, a tool made by the [EQUATOR Network](#) in collaboration with [Penelope.ai](#)



# BMJ Open

## The impact of dementia education and training on health and social care staff knowledge, attitudes and confidence: A cross-sectional study

|                                 |                                                                                                                                                                                                                                                                                                                                                                                                                                                                                                                                                                                          |
|---------------------------------|------------------------------------------------------------------------------------------------------------------------------------------------------------------------------------------------------------------------------------------------------------------------------------------------------------------------------------------------------------------------------------------------------------------------------------------------------------------------------------------------------------------------------------------------------------------------------------------|
| Journal:                        | <i>BMJ Open</i>                                                                                                                                                                                                                                                                                                                                                                                                                                                                                                                                                                          |
| Manuscript ID                   | bmjopen-2020-039939.R2                                                                                                                                                                                                                                                                                                                                                                                                                                                                                                                                                                   |
| Article Type:                   | Original research                                                                                                                                                                                                                                                                                                                                                                                                                                                                                                                                                                        |
| Date Submitted by the Author:   | 09-Nov-2020                                                                                                                                                                                                                                                                                                                                                                                                                                                                                                                                                                              |
| Complete List of Authors:       | Parveen , Sahdia; University of Bradford, Centre For Applied Dementia Studies<br>Smith, Sarah; Leeds Beckett University, Centre for Dementia Research<br>Sass, Cara; Leeds Beckett University, Centre for Dementia Research<br>Oyebode, Jan; University of Bradford, Centre for Applied Dementia Studies<br>Capstick, Andrea; University of Bradford, Centre for Applied Dementia Studies<br>Dennison, Alison; University of Bradford, Centre for Applied Dementia Studies<br>Surr, Claire; Leeds Beckett University Faculty of Health and Social Sciences, Centre for Dementia Research |
| <b>Primary Subject Heading</b>: | Medical education and training                                                                                                                                                                                                                                                                                                                                                                                                                                                                                                                                                           |
| Secondary Subject Heading:      | Evidence based practice                                                                                                                                                                                                                                                                                                                                                                                                                                                                                                                                                                  |
| Keywords:                       | Dementia < NEUROLOGY, EDUCATION & TRAINING (see Medical Education & Training), GERIATRIC MEDICINE                                                                                                                                                                                                                                                                                                                                                                                                                                                                                        |
|                                 |                                                                                                                                                                                                                                                                                                                                                                                                                                                                                                                                                                                          |

SCHOLARONE™  
Manuscripts



I, the Submitting Author has the right to grant and does grant on behalf of all authors of the Work (as defined in the below author licence), an exclusive licence and/or a non-exclusive licence for contributions from authors who are: i) UK Crown employees; ii) where BMJ has agreed a CC-BY licence shall apply, and/or iii) in accordance with the terms applicable for US Federal Government officers or employees acting as part of their official duties; on a worldwide, perpetual, irrevocable, royalty-free basis to BMJ Publishing Group Ltd ("BMJ") its licensees and where the relevant Journal is co-owned by BMJ to the co-owners of the Journal, to publish the Work in this journal and any other BMJ products and to exploit all rights, as set out in our [licence](#).

The Submitting Author accepts and understands that any supply made under these terms is made by BMJ to the Submitting Author unless you are acting as an employee on behalf of your employer or a postgraduate student of an affiliated institution which is paying any applicable article publishing charge ("APC") for Open Access articles. Where the Submitting Author wishes to make the Work available on an Open Access basis (and intends to pay the relevant APC), the terms of reuse of such Open Access shall be governed by a Creative Commons licence – details of these licences and which [Creative Commons](#) licence will apply to this Work are set out in our licence referred to above.

Other than as permitted in any relevant BMJ Author's Self Archiving Policies, I confirm this Work has not been accepted for publication elsewhere, is not being considered for publication elsewhere and does not duplicate material already published. I confirm all authors consent to publication of this Work and authorise the granting of this licence.

1  
2 TITLE: The impact of dementia education and training on health and social care staff  
3  
4 knowledge, attitudes and confidence: A cross-sectional study  
5  
6  
7

8  
9 AUTHORS: Sahdia Parveen\*<sup>1</sup>, Sarah J Smith<sup>2</sup>, Cara Sass<sup>2</sup>, Jan R Oyebode<sup>1</sup>, Andrea Capstick<sup>1</sup>,  
10  
11 Alison Dennison<sup>1</sup> and Claire A Surr<sup>2</sup>.  
12  
13

14  
15 \*Corresponding author. Dr Sahdia Parveen. Centre for Applied Dementia Studies, University of  
16  
17 Bradford, Richmond Road, Bradford, West Yorkshire, BD7 1DP. Tel: 01274 236089. Email:  
18  
19 [s.parveen27@bradford.ac.uk](mailto:s.parveen27@bradford.ac.uk)  
20  
21  
22

23  
24  
25 Sarah J Smith [s.j.smith@leedsbeckett.ac.uk](mailto:s.j.smith@leedsbeckett.ac.uk)  
26

27  
28 Cara Sass [c.sass@leedsbeckett.ac.uk](mailto:c.sass@leedsbeckett.ac.uk)  
29

30  
31 Jan R Oyebode [j.oyebode@bradford.ac.uk](mailto:j.oyebode@bradford.ac.uk)  
32

33  
34 Andrea Capstick [a.j.capstick@bradford.ac.uk](mailto:a.j.capstick@bradford.ac.uk)  
35

36  
37 Alison Dennison [a.j.capstick@bradford.ac.uk](mailto:a.j.capstick@bradford.ac.uk)  
38

39  
40 Claire A Surr [c.a.surr@bradford.ac.uk](mailto:c.a.surr@bradford.ac.uk)  
41

- 42 1. Centre for Applied Dementia Studies, University of Bradford.
- 43 2. Centre for Dementia Research, Leeds Beckett University.
- 44
- 45
- 46
- 47
- 48

49  
50 WORD COUNT = 3721  
51  
52  
53  
54  
55  
56  
57  
58  
59  
60

## ABSTRACT

Objectives: The aim of this study was to establish the impact of dementia education and training on the knowledge, attitudes and confidence of health and social care staff. The study also aimed to identify the most effective features (content and pedagogical) of dementia education and training.

Design: Cross sectional survey study. Data collection occurred in 2017.

Settings: Health and social care staff in the UK including acute care, mental health community care trusts, primary care, and care homes.

Participants: All health and social care staff who had completed dementia education and training meeting the minimal standards as set by Health Education England, within the past five years were invited to participate in an online survey. A total of 668 health and social care staff provided informed consent and completed an online survey, and responses from 553 participants were included in this study. The majority of the respondents were of white British ethnicity (94.4%) and identified as female (88.4%).

Outcomes: Knowledge, attitude and confidence of health and social care staff.

Results: Hierarchical multiple regression analysis was conducted. Staff characteristics, education and training content variables and pedagogical factors were found to account for 29% of variance in staff confidence ( $F = 4.13, p < .001$ ), 22% of variance in attitude (knowledge) ( $F = 3.80, p < .001$ ), 18% of the variance in staff knowledge ( $F = 2.77, p < .01$ ) and 14% of variance in staff comfort (attitude) ( $F = 2.11, p < .01$ ).

Conclusion: The results suggest that dementia education and training has limited impact on health and social care staff learning outcomes. Whilst training content variables were important

1  
2 when attempting to improve staff knowledge, more consideration should be given to pedagogical  
3  
4 factors when training is aiming to improve staff attitude and confidence.  
5

## 6 ARTICLE SUMMARY

### 7 8 9 STRENGTHS AND LIMITATIONS OF THIS STUDY

- 10  
11 • This study explores the impact of a diverse range of dementia education and training  
12 packages.  
13
- 14  
15 • The study explores the impact of pedagogical factors as well as content based variables  
16
- 17  
18 • The sample of health and social care professionals included in this study is not  
19  
20 representative of the dementia care workforce in the UK.  
21
- 22  
23 • The cross-sectional design of the study limits inferences with regards to the impact of  
24  
25 dementia education and training on staff learning outcomes.  
26

### 27 28 KEY WORDS

29  
30 Dementia; Alzheimer's Disease, Training, Health care, Social care  
31  
32  
33  
34  
35  
36  
37  
38  
39  
40  
41  
42  
43  
44  
45  
46  
47  
48  
49  
50  
51  
52  
53  
54  
55  
56  
57  
58  
59  
60

## BACKGROUND

There are approximately 50 million people living with dementia worldwide and this is set to increase to 75 million by 2030 and 131.5 million by the year 2050. [1] This increase in the number of people living with dementia is primarily thought to be due to improving health care. Better health care has led to an increased life expectancy, therefore there is a greater proportion of older people worldwide. The rising number of people affected by dementia and the increasing cost has led to a number of countries developing national dementia strategies. These strategies include the need for a health and social care workforce that is appropriately trained and skilled to deliver good dementia care.

Within the UK, there are currently 850, 000 people living with dementia, with the cost of care predicted to be £26 billion. [2] Research estimates that in England up to 40% of patients in hospitals are living with dementia [3] and up to 80% of residents in care homes are living with dementia. [4] Inadequate and poor care leads to a reduced quality of life for people living with dementia and a higher overall cost to the NHS, due to avoidable hospital admissions [5] and longer hospital stays. Therefore, a key feature of English National Dementia Strategies [6-8] is the focus upon dementia education and training for the health and social care workforce, in order to deliver good person-centred care. The ‘dementia workforce’ is defined as any individual who may have contact with people living with dementia in health and social care settings from the point of diagnosis to end of life care. The need for a clear evidence base for effective features of dementia education and training for health and social care staff has also been identified [8].

As part of a national programme of work around implementation of quality dementia education and training, Health Education England developed a Dementia Training Standards Framework [9] (‘The Framework’ hereafter). This set the ‘gold standard’ for training content, with regard to identifying the knowledge and skills needed to deliver good dementia care. It is

1  
2 comprised of three Tiers. Tier 1 is 'Dementia Awareness' and is to be completed by all staff  
3  
4 working in any post in health and social care. Staff with regular contact with people with  
5  
6 dementia complete Tier 2 training, and Tier 3 provides advanced skills for leaders in dementia  
7  
8 care. The Framework consists of 14 subjects in total. Each subject comprises of several learning  
9  
10 outcomes that staff are required to accomplish in order to deliver good quality and effective  
11  
12 dementia care. Whilst the Framework provides comprehensive guidance for key content for  
13  
14 dementia education and training, it does not take into account pedagogical considerations of  
15  
16 training.  
17  
18  
19

20  
21 There has been a growing body of research exploring the impact of dementia education  
22  
23 on staff knowledge and skills. Some studies [10-17] have demonstrated that dementia education  
24  
25 and training can improve staff knowledge, confidence, foster positive attitudes and produce  
26  
27 better outcomes for people living with dementia. In contrast, some studies have demonstrated  
28  
29 that dementia training lacks efficacy and has no impact on staff or patient outcomes. [18-20] A  
30  
31 recent review by Surr et al [21] identified 152 studies exploring the impact of dementia  
32  
33 education and training. The findings of this comprehensive review suggest that dementia  
34  
35 education can be efficacious if pedagogical factors are considered. The review suggests that  
36  
37 training and education was found to be most effective if staff considered the training to be  
38  
39 relevant to their role, involved active face to face participation, underpinned practice based  
40  
41 learning with theory, the training was delivered by an experienced facilitator, was at least eight  
42  
43 hours in duration and provided structured guidelines for care practice. The review highlights that  
44  
45 the dementia workforce is diverse and has heterogeneous training and education needs. This  
46  
47 makes identifying effective training components highly complex. Previous studies (with the  
48  
49 exception of Jack-Waugh et al., 2018) exploring the impact of dementia education and training  
50  
51  
52  
53  
54  
55  
56  
57  
58  
59  
60

1  
2 have primarily focused on a single training programme with limited focus on pedagogical  
3  
4 considerations, and with a select group of health and social care staff.  
5

6 The aim of this study is to explore the impact of dementia education and training on  
7  
8 health and social care staff in the UK and to identify the most effective features (content and  
9  
10 pedagogical) and other factors of dementia training. It aimed to include a diverse range of  
11  
12 dementia education and training packages and staff working across different service settings that  
13  
14 provide dementia care.  
15  
16

## 17 18 METHOD

### 19 20 *Study design:*

21  
22 This study is a survey based cross-sectional observational study.  
23  
24

### 25 26 *Setting:*

27 This study was conducted in England. Data collection occurred in 2017 via an online survey  
28  
29 completed by health and social care (working in acute care, community mental health care trust,  
30  
31 primary care, pharmacies and care homes) staff.  
32  
33

### 34 35 *Procedure:*

36 This study received ethical approval from Leeds Beckett University (Ref 27387). An audit of  
37  
38 dementia education and training in England was conducted in 2017 to establish if current training  
39  
40 programmes met the learning outcomes set out by Health Education England's Dementia  
41  
42 Training Standards Framework. The findings of the audit are described by Smith et al [22]. In  
43  
44 total 614 respondents (Care Providers, Training providers and Commissioners) reported on 382  
45  
46 training packages in the audit, 183 respondents reported one or more packages that met the  
47  
48 criteria for being a package of interest. These 183 respondents were asked to circulate an invite  
49  
50 to an online staff survey measuring knowledge, attitudes and confidence, to all participants that  
51  
52 had completed the training package(s) of interest they had reported. The survey was administered  
53  
54  
55  
56  
57  
58  
59  
60



1 using a web based tool, SNAP (see <https://www.snapsurveys.com/>), which enables surveys to be  
2 individualised, which allowed the names of the specific packages of interest to be added to the  
3 survey distributed by each audit respondent. The survey was promoted by including university  
4 and Health Education England logos on the invite and survey, clearly defined completion times,  
5 follow up emails, and an offer of a prize draw entry.  
6  
7  
8  
9  
10  
11  
12

### 13 *Participants:*

14 All health and social care staff who had completed one of the training packages of interest in the  
15 past five years and who were still contactable by the audit respondents, were approached to  
16 participate. Survey participants were required to be 18 years or over, and be able to read and  
17 write in English. No other eligibility criteria were applied.  
18  
19  
20  
21  
22  
23

### 24 *Measures:*

25 The survey comprised of questions concerning:  
26  
27  
28  
29

- 30 • Staff characteristics (gender, age, ethnicity, length in role, job role).
  - 31 • Reaction to each training course completed, measured on a five-point Likert Scale (one =  
32 strongly disagree to five = strongly agree), with a high score indicating a positive  
33 reaction.  
34  
35  
36  
37  
38  
39  
40  
41  
42  
43  
44  
45  
46  
47  
48  
49  
50
1. Satisfaction (How satisfied were you with the training you received?)
  2. Relevance (How relevant was the training to your role/training needs?)
  3. Understanding (How easy was the material to understand?)
  4. Recommendation (How likely are you to recommend the training to colleagues?)

51 Measures of staff knowledge, attitudes and confidence were selected on the basis that the scales  
52 had previously demonstrated good validity and reliability.  
53  
54  
55  
56  
57  
58  
59  
60

- 1  
2 • Knowledge in dementia scale. [23] This measure of knowledge about dementia contains  
3  
4 16 items which respondents categorise as True, False, or Don't know (scored as 0.5). The  
5  
6 scale has been demonstrated to have satisfactory internal reliability with Cronbach alpha  
7  
8 of 0.72 reported. Possible scores range from 0-21.  
9  
10
- 11 • The Dementia Attitudes Scale. [24] This attitude scale consists of two subscales:  
12  
13 dementia knowledge (e.g. people with dementia can enjoy life) and comfort (e.g. I feel  
14  
15 confident around people with dementia), each containing 10 items. Both subscales have  
16  
17 been reported to have good internal reliability with Cronbach alphas reported as 0.83 and  
18  
19 0.85 respectively. The items are rated on a seven-point Likert scale. Possible scores range  
20  
21 from 10-70 for each subscale.  
22  
23
- 24 • The Confidence in Dementia Scale. [23] This is a nine item scale assessing staff  
25  
26 confidence in providing care to people with dementia. The items are measured on a five-  
27  
28 point Likert scale and have been found to demonstrate excellent internal reliability with a  
29  
30 Cronbach alpha of 0.9. Possible scores range from nine to 45.  
31  
32  
33  
34

#### 35 *Data analysis:*

36  
37 SPSSv22 was used to analyse all quantitative data. Descriptive statistics were produced for  
38  
39 demographic data and staff outcomes of knowledge, attitudes and confidence. Hierarchical  
40  
41 regression analysis was performed to examine the amount of variance in staff outcomes  
42  
43 explained by contextual factors and training. Dummy variables were created for categorical  
44  
45 variables (such as staff role) before being entered into the regression model. Where there were  
46  
47 adequate numbers of responses in relation to training packages, these packages were included in  
48  
49 the regression analyses. The training packages were re-categorised and new variables created  
50  
51 based on number of learning outcomes, number of subjects, tier level (1-3) and whether the  
52  
53 training covered specific subjects. Of the 14 different subject areas included in the Framework,  
54  
55  
56  
57  
58  
59  
60

1  
2 only one (pharmacological interventions), was not covered by at least one of the included  
3  
4 training packages. A sample size estimation was calculated using recommendations by  
5  
6 Tabachnick and Fidel [25] which state the formula  $50 + 8m$  whereby  $m$  is the number of  
7  
8 independent variables. A total of 36 independent variables were created suggesting a sample size  
9  
10 of 338 would be sufficient for hierarchical regression. Preliminary analysis was conducted to  
11  
12 ensure no violation of the assumptions of normality, linearity, multi-collinearity, and  
13  
14 homoscedasticity. The variables were entered into the hierarchical regression model in the  
15  
16 following three steps:  
17  
18

19  
20 Step 1: Staff characteristics including, gender, age, ethnicity, staff role and length of time in role.  
21

22 Step 2: Pedagogical variables including duration of training, mode of delivery, when completed,  
23  
24 where completed and number of training courses completed.  
25

26  
27 Step 3: Content variables including training tier, number of learning outcomes, number of  
28  
29 subjects, and subject areas covered.  
30

### 31 *Patient and Public Involvement:*

32  
33  
34

35 Patient and public involvement (PPI) was an important aspect of this study and considered to be  
36  
37 experts by experience [26] and were involved from the conception and design of the study to  
38  
39 dissemination of the outcomes. The core PPI group consisted of three people living with  
40  
41 dementia and eight family members, and met 15 times over the lifetime of the study. Throughout  
42  
43 the study, as recommended by Mathie et al [27] and Ocloo et al [28] there was a particular  
44  
45 emphasis on the active involvement of experts by experience, particularly in aspects of the  
46  
47 research process which are less frequently seen in PPI, such as design, data collection, and  
48  
49 analysis. Within the work package reported in this article, experts by experience took active part  
50  
51 in the following aspects: designing survey materials, ensuring appropriate language was used,  
52  
53 and interpretation of the findings.  
54  
55  
56  
57  
58  
59  
60

## RESULTS

*Participants:*

A total of 668 participants who had participated in at least one of the training packages of interest, completed the survey, representing 60 training packages in total. Due to a low response rate for some packages, to permit robust analysis, only packages with ten or more respondents were included in subsequent data analysis. This resulted in 18 dementia education and training packages with a total of 553 respondents being included in the final sample. Approximately 88.4% of the sample identified as female and 94.4% as white British. Further staff characteristics are presented in table 1.

Of the 18 packages included in the analysis, 16 were delivered as face to face (of which one incorporated e-learning, three included mentoring and one utilised simulation). One training package was delivered solely as an e-learning package and one as simulation based learning. Six of the packages were categorised as Tier 1, 10 were Tier 2, and two were Tier 3. All packages met at least 75% of learning outcomes set out in the 'Framework'. The most popular subject covered by the training packages was person centred dementia care (15) and communication, interaction, and behaviour in dementia care (15), followed by dementia awareness (11), Living well with dementia and promoting independence (8), Law, ethics and safeguarding (6), Families and carers as partners in dementia care(4), dementia identification, assessment and diagnosis (3), Health and wellbeing in dementia care (3), Equality, diversity and inclusion in dementia care (2), Dementia risk reduction and prevention (1), End of life dementia care (1), Research and evidence based dementia care (1), Leadership in transforming dementia care (1), and finally no package included the subject of pharmacological interventions in dementia care.

Insert Table 1 here.

### *Impact of training on staff confidence*

With regards to staff confidence, scores ranged from 11 to 45 (highest possible score is 45), with an average score of 35.31 (SD = 7.64). The final hierarchical model ( $F = 4.13$ ,  $p < .001$ ) accounted for 29% of the variance in staff confidence. Pedagogical factors accounted for 11%, staff characteristics accounted for 10% of the variance, and content variables accounted for 8% of the variance in staff confidence. Only staff characteristics were found to significantly determine variance in staff confidence. Those who were older in age, had more than one year experience and were either clinical (qualified or non qualified) or management level staff were more likely to have high levels of staff confidence. Staff confidence hierarchical regression results are presented in Table 2.

Insert Table 2 here.

### *Impact of training on attitudes (knowledge)*

Participant scores ranged from 12-56 (highest score possible is 70) with regards to the knowledge subscale from the O'Connor Attitude measure, with an average score of 51.68 (SD = 5.08). The final hierarchical regression model accounted for 22% of the variance in staff attitudinal knowledge ( $F = 3.80$ ,  $p < .01$ ). Content variables accounted for 11% of the variance, pedagogical variables accounted for 8% and staff characteristics accounted for 3% of the variance in staff attitudinal knowledge. Similar variables accounted for a significant amount of variance in staff attitudinal knowledge as they did factual knowledge: older age, having more than two years of experience in role, face to face delivery of training, mentoring, simulation based training, and completion of tier two training. Again, those who had completed health and wellbeing, and families and carers as partners in dementia care accounted for lower levels of staff attitudinal knowledge. Attitudinal knowledge hierarchical regression results are presented in Table 3.

1  
2  
3  
4  
5  
6  
7  
8  
9  
10  
11  
12  
13  
14  
15  
16  
17  
18  
19  
20  
21  
22  
23  
24  
25  
26  
27  
28  
29  
30  
31  
32  
33  
34  
35  
36  
37  
38  
39  
40  
41  
42  
43  
44  
45  
46  
47  
48  
49  
50  
51  
52  
53  
54  
55  
56  
57  
58  
59  
60

Insert Table 3 here

#### *Impact of dementia training on staff knowledge*

The knowledge scores for the overall sample ranged from 7.5 to 16 (out of a potential score of 21) and the average score achieved was 13.80 (SD = 1.86). The final hierarchical model accounted for 18% of the variance in staff knowledge ( $F = 2.77, p < .01$ ). That is only 18% of staff knowledge is accounted for by the variables entered into the model. Content variables accounted for 8%, staff characteristics accounted for 6% of the variance, pedagogical variables accounted for 4% of the variance in staff knowledge. An examination of the co-efficients suggests older age and having more than two years of experience in role were variables that accounted for a significant amount of variance in staff knowledge. Having completed either face to face delivery of training, e-learning, or simulation based training, training which covered a higher number of learning outcomes across the Framework, and completion of tier one training had a larger impact on staff knowledge. Interestingly those who had only completed subjects covering health and wellbeing, and families and carers as partners in dementia care had lower levels of staff knowledge. Those who had completed leadership subjects in addition to other subjects demonstrated higher levels of knowledge. Knowledge hierarchical regression results are presented in Table 4.

Insert Table 4 here

#### *Impact of training on attitudes (staff comfort)*

Attitude (with regards to comfort levels) scores ranged from 12-56 (highest possible score is 70) with an average score of 51.51 (SD = 5.08). The final hierarchical regression model ( $F = 2.11, p < .01$ ) accounted for 14% of the variance in how comfortable staff perceived themselves to be in delivering dementia care. Pedagogical variables accounted for 7%, content variables accounted for 4% of the variance and staff characteristic accounted for 3% of the

1  
2 variance in staff comfort levels. Significant determinants of staff comfort included: ethnicity  
3  
4 (being white British), face to face delivery of training, e learning, number of courses attended,  
5  
6 and completion of tier three training. Those who had completed health and wellbeing training  
7  
8 again had lower levels of comfort, however, those who had completed equality and diversity  
9  
10 training were found to have higher levels of comfort. Attitude (comfort) hierarchical regression  
11  
12 results are presented in Table 5.  
13  
14

15  
16 Insert table 5 here.  
17  
18  
19  
20  
21

## 22 DISCUSSION

23  
24 The purpose of this study was to establish the impact of dementia education and training on the  
25  
26 knowledge, attitudes and confidence of health and social care staff. The findings suggest that  
27  
28 dementia education and training in general has limited impact on the knowledge, attitudes and  
29  
30 confidence of health and social care staff. Although the final regression models including staff  
31  
32 characteristics, pedagogical factors and training content variables were statistically significant,  
33  
34 they accounted for less than 30% of the variance in staff outcomes, suggesting other factors  
35  
36 beyond dementia education and training have greater impact on staff knowledge, attitudes and  
37  
38 confidence. The literature suggests there are a range of factors that may also influence staff  
39  
40 feelings of confidence and competence to deliver dementia care these include 1) organizational  
41  
42 climate and factors [29] for example, the provision of practical support to implement care  
43  
44 practices [30,32], promotion of staff autonomy and trust [30] and how the organization supports  
45  
46 implementation of training into practice and the delivery of good dementia care [31]; 2)  
47  
48 individual factors [29] for example staff burnout [30] and staff attitudes (more positive attitude  
49  
50 and intentions to implement PCC lead to greater confidence) confident [33].  
51  
52  
53  
54  
55  
56  
57  
58  
59  
60

1  
2  
3  
4 The final models indicated that experience was an important influencing factor, with  
5  
6 older staff age and longer time in role, being important determinants of staff knowledge, attitudes  
7  
8 and confidence. With regards to pedagogical factors, training courses that made use of face to  
9  
10 face teaching, with a combination of simulation based learning or e learning, were the most  
11  
12 likely to have an impact on staff outcomes. Training content (learning outcomes) was found to  
13  
14 have limited impact on staff outcomes, completion of tier one dementia education and training  
15  
16 was most impactful for staff knowledge as measured by the KIDE [23], tier two training was  
17  
18 most impactful on staff attitudes and tier three was associated with greater staff confidence. This  
19  
20 suggests the 'Tiers' are fulfilling their goals with higher learning leading to reflection, attitudinal  
21  
22 change and confidence. The results also suggest that whilst training content variables such as  
23  
24 learning outcomes are important when attempting to improve staff knowledge, more  
25  
26 consideration should be given to pedagogical factors when training is aiming to improve staff  
27  
28 attitude and confidence.  
29  
30  
31  
32  
33

34 Smith et al. [22] report that approximately 70% of dementia education and training  
35  
36 programmes meet only the Tier one learning outcomes as set out by Dementia Core Skills  
37  
38 Framework [9], and less than 40% met the requirements for Tier two and Tier three. The findings  
39  
40 from the current study suggest that Tier 2 and Tier 3 training is required to develop a dementia  
41  
42 care workforce that fosters positive attitudes and is confident in providing high quality dementia  
43  
44 care. However, this may also be confounded by experience and contact with people living with  
45  
46 dementia. That is the positive attitude and confidence may be due to experience as opposed to  
47  
48 the level of training.  
49  
50  
51

52 The findings of this study echo findings of previous studies reporting some positive but  
53  
54 limited impact of dementia education and training on staff outcomes [10-17]. However much  
55  
56  
57  
58  
59



1  
2 past research has focused on specific training programmes with an emphasis on the learning  
3  
4 outcomes of the training programme. Whilst the current results suggest that there was a limited  
5  
6 impact on staff outcomes as a result of training, this may be due to the included training  
7  
8 programmes being primarily focused on learning outcomes and subjects rather than on  
9  
10 pedagogical factors. The results suggest that for training to be impactful beyond staff knowledge  
11  
12 development, pedagogical factors, such as mode of delivery, need to be considered. The results  
13  
14 demonstrate that the most impactful training programmes were those that were delivered face to  
15  
16 face with some form of simulation based learning, mentoring and or e-learning. These findings  
17  
18 are in-line with those reported by Surr et al. [21] in their systematic review. The review  
19  
20 highlighted that the most effective dementia education and training packages were those that  
21  
22 were delivered face to face by an experienced trainer, included practice based learning  
23  
24 underpinned by theory and clear guidelines for clinical practice. The review highlighted the  
25  
26 difficulty of establishing a single effective training programme for a diverse care workforce. We  
27  
28 echo those observations as the current findings suggest that diverse pedagogical and subject  
29  
30 content factors were of importance for staff at varying levels of experience.  
31  
32  
33  
34  
35

36 The findings of the current study should be interpreted with caution. The main limitation of  
37  
38 the study is the homogenous staff sample who were mainly older, white British women, who had  
39  
40 worked in clinical roles for over 10 years. This limits the generalisability of the findings to the  
41  
42 dementia care workforce, who are considered to be heterogeneous. The survey had a low  
43  
44 response rate which may have been due to organisations not being able to reach relevant staff,  
45  
46 due to staff either moving away or the organisation not keeping a record of who had completed  
47  
48 the training. The survey was only available in the English language and was also reported to be  
49  
50 lengthy to complete, potentially further limiting responses from participants from diverse  
51  
52 backgrounds. The survey utilised measures that had previously been used within specific settings  
53  
54  
55  
56  
57  
58  
59

1  
2 such as acute care. This may have had an impact on the results but it is worth noting that the  
3  
4 measures continued to demonstrate good reliability despite being used in diverse settings.  
5  
6 Furthermore, the design of the study limited the possibilities of controlling for all possible  
7  
8 confounding factors, due to a small sample size and a large number of independent variables. It  
9  
10 was not possible to explore interactional effects via structural equation modelling or multi-level  
11  
12 modelling due to the limited sample of respondents. Findings related to impact on staff  
13  
14 confidence should also be interpreted with caution as a ceiling effect was observed. A further  
15  
16 limitation is that we were unable to obtain collection of outcome data pre- and post-training and  
17  
18 therefore, it is not possible to determine whether staff knowledge, attitudes and skills were a  
19  
20 direct result of attendance at the reported dementia education or training programme.  
21  
22  
23

24  
25 Despite the above limitations, a large enough sample of staff was recruited to explore the  
26  
27 impact of training and the features of impactful training. The findings have clear implications  
28  
29 for all health and social care staff who are required to undergo some form of dementia education  
30  
31 and training. The study also has implications for policy makers and training commissioners. It is  
32  
33 a requirement of the National Dementia Strategy [6] to develop an informed dementia care  
34  
35 workforce. This study suggests that training providers and commissioners need to move beyond  
36  
37 subject learning outcomes and also consider pedagogical factors and depth of education to have a  
38  
39 truly significant impact on staff attitudes and confidence. Further research is required to establish  
40  
41 the specific needs of distinct health and social care staff for example the training needs of  
42  
43 working in acute hospital care will differ from those working in care home settings. A targeted  
44  
45 approach is required whereby health care professionals have access to strong Tier 2 and Tier 3  
46  
47 training which is relevant to their role.  
48  
49  
50  
51  
52  
53  
54  
55  
56  
57  
58  
59  
60

1  
2 In general, the findings of this study suggest that currently dementia education and training  
3  
4 has some limited impact on the knowledge, attitudes and confidence of health and social care  
5  
6 staff. The pedagogical factors of training such as mode of delivery are important in ensuring  
7  
8 training is effective in changing attitudes and confidence as well as staff knowledge. Dementia  
9  
10 education and training providers/commissioners should consider staff characteristics and  
11  
12 pedagogical factors as well as subject content/learning outcomes when providing dementia  
13  
14 education and training to the dementia care workforce.  
15  
16  
17  
18  
19

#### 20 FUNDING STATEMENT:

21  
22 The report is based on independent research commissioned and funded by the NIHR Policy  
23 Research Programme (Understanding Effective Dementia Workforce Education and Training: A  
24 Formative Evaluation (DeWET Evaluation), PR-R10-0514-12006). The funding body had no  
25 role in the design of the study and collection, analysis, and interpretation of data and in writing  
26 the manuscript. The views expressed in the publication are those of the author(s) and not  
27 necessarily those of the NHS, the NIHR, the Department of Health and Social care, 'arms' length  
28 bodies or other government departments.  
29

30  
31 COMPETING INTERESTS STATEMENT: None to declare  
32

#### 33 AUTHOR CONTRIBUTIONS:

34  
35 SP: Co-led the survey work package with SS. SP was involved with study conception, study  
36 design, led data analysis and authored the manuscript.  
37

38  
39 SS: Co-led the survey work package with SP, was involved with study conception, design and  
40 provision of editorial input into the manuscript.  
41

42  
43 CS: CSs developed and disseminated survey materials, contributed to data management and  
44 editorial input into the manuscript.  
45

46  
47 JO contributed to design, data interpretation and provision of editorial input into the manuscript.  
48

49  
50 AC led the involvement of experts by experience, contributed to the design of the study and  
51 provided editorial input into the manuscript.  
52

53  
54 AD is an expert by experience who was involved with all aspects of this study.  
55  
56  
57  
58  
59

1  
2 CAS: Was Chief Investigator and contributed to study conception, design, data interpretation and  
3  
4 provision of editorial input into the manuscript.  
5

6 **ACKNOWLEDGMENTS:**  
7

8  
9 We would like to acknowledge and thank all the organisations and individuals that supported this  
10  
11 study. We would also like to acknowledge Ms Michelle Drury for supporting survey  
12  
13 dissemination.  
14

15  
16 **DATA SHARING STATEMENT:** Data may be made available from the authors upon  
17  
18 reasonable request.  
19  
20  
21  
22  
23  
24  
25  
26  
27  
28  
29  
30  
31  
32  
33  
34  
35  
36  
37  
38  
39  
40  
41  
42  
43  
44  
45  
46  
47  
48  
49  
50  
51  
52  
53  
54  
55  
56  
57  
58  
59  
60

1  
2  
3  
4  
5  
6  
7  
8  
9  
10  
11  
12  
13  
14  
15  
16  
17  
18  
19  
20  
21  
22  
23  
24  
25  
26  
27  
28  
29  
30  
31  
32  
33  
34  
35  
36  
37  
38  
39  
40  
41  
42  
43  
44  
45  
46  
47  
48  
49  
50  
51  
52  
53  
54  
55  
56  
57  
58  
59  
60  
REFERENCES

[1] Alzheimer's Disease International. Dementia: A Public Health Priority. London: WHO; 2012. [https://www.who.int/mental\\_health/publications/dementia\\_report\\_2012/en/](https://www.who.int/mental_health/publications/dementia_report_2012/en/).

[2] Alzheimer's Disease International. World Alzheimer Report. The state of the art dementia research; New frontiers. London, 2018. <https://www.alz.co.uk/news/world-alzheimer-report2018-state-of-art-of-dementia-research-newfrontiers>.

[3] Alzheimer's Society. Counting the cost. Caring for people with dementia on hospital wards. London: Alzheimer's Society; 2009. [https://www.alzheimers.org.uk/sites/default/files/2018-05/Counting\\_the\\_cost\\_report.pdf](https://www.alzheimers.org.uk/sites/default/files/2018-05/Counting_the_cost_report.pdf).

[4] Prince M, Knapp M, Guerchet M, et al. Dementia UK: report to the Alzheimer's society. London: Alzheimer's Society; 2014. [https://www.alzheimers.org.uk/sites/default/files/migrate/downloads/dementia\\_uk\\_update.pdf](https://www.alzheimers.org.uk/sites/default/files/migrate/downloads/dementia_uk_update.pdf).

[5] Becker, M.A., Boaz, T.L., Andel, R., Gum, A.M. and Papadopoulos, A.S., 2010. Predictors of preventable nursing home hospitalizations: the role of mental disorders and dementia. *The American Journal of Geriatric Psychiatry*, 18(6), pp.475-482.

[6] Department of Health, Living well with dementia: A National Dementia Strategy. 2009, Department of Health: London.

[7] Department of Health, Prime Minister's challenge on dementia. delivering major improvements in dementia care and research by 2015. 2012, Department of Health: London

[8] Department of Health, Prime Minister's challenge on dementia 2020. 2015, Department of Health: London

[9] Skills for Health, Health Education England, Skills for Care. Dementia Core Skills Education and Training Framework Skills for Health, London; 2015. [https://www.housinglin.org.uk/\\_assets/Resources/Housing/OtherOrganisation/Dementia\\_Core\\_Skills\\_Education\\_and\\_Training\\_Framework.pdf](https://www.housinglin.org.uk/_assets/Resources/Housing/OtherOrganisation/Dementia_Core_Skills_Education_and_Training_Framework.pdf).

[10] Liu JY, Lai C, Dai D, et al. Attitudes in the management of patients with dementia: comparison in doctors with and without special training. *East Asian archives of psychiatry*. 2013 Mar;23(1):13.

[11] Spector A, Orrell M, Goyder J. A systematic review of staff training interventions to reduce the behavioural and psychological symptoms of dementia. *Ageing research reviews*. 2013 Jan 1;12(1):354-64.

[12] Galvin JE, Meuser TM, Morris JC. Improving physician awareness of Alzheimer's disease and enhancing recruitment: the Clinician Partners Program. *Alzheimer disease and associated disorders*. 2012 Jan;26(1):61.

- 1  
2 [13] Jennings, A., McLoughlin, K., Boyle, S., Thackeray, K., Quinn, A., O’Sullivan, T. and  
3 Foley, T., 2019. Development and evaluation of a primary care interprofessional education  
4 intervention to support people with dementia. *Journal of interprofessional Care*, 33(5), pp.579-  
5 582.  
6
- 7 [14] Jack-Waugh, A., Ritchie, L., & MacRae, R. (2018). Assessing the educational impact of the  
8 dementia champions programme in Scotland: Implications for evaluating professional dementia  
9 education. *Nurse education today*, 71, 205-210.  
10
- 11 [15] Wang, Y., Xiao, L.D., Ullah, S., He, G.P. and De Bellis, A., 2017. Evaluation of a nurse-led  
12 dementia education and knowledge translation programme in primary care: A cluster randomized  
13 controlled trial. *Nurse education today*, 49, pp.1-7.  
14
- 15 [16] O’Brien, R., Goldberg, S.E., Pilnick, A., Beeke, S., Schneider, J., Sartain, K., Thomson, L.,  
16 Murray, M., Baxendale, B. and Harwood, R.H., 2018. The VOICE study—A before and after  
17 study of a dementia communication skills training course. *PloS one*, 13(6), p.e0198567.  
18
- 19 [17] Rokstad, A.M.M., Døble, B.S., Engedal, K., Kirkevold, Ø., Benth, J.Š. and Selbæk, G.,  
20 2017. The impact of the Dementia ABC educational programme on competence in  
21 person-centred dementia care and job satisfaction of care staff. *International Journal of Older  
22 People Nursing*, 12(2), p.e12139.  
23
- 24 [18] Beer C, Horner B, Flicker L, et al. A cluster-randomised trial of staff education to improve  
25 the quality of life of people with dementia living in residential care: the DIRECT study. *PloS  
26 one*. 2011;6(11).  
27
- 28 [19] Beer LE, Hutchinson SR, Skala-Cordes KK. Communicating with patients who have  
29 advanced dementia: training nurse aide students. *Gerontology & geriatrics education*. 2012 Oct  
30 1;33(4):402-20.  
31
- 32 [20] Visser SM, McCabe MP, Hudgson C, et al. Managing behavioural symptoms of dementia:  
33 effectiveness of staff education and peer support. *Aging and Mental Health*. 2008 Jan 1;12(1):47-  
34 55.  
35
- 36 [21] Surr CA, Gates C, Irving D, et al. Effective dementia education and training for the health  
37 and social care workforce: a systematic review of the literature. *Review of educational research*.  
38 2017 Oct;87(5):966-1002.  
39
- 40 [22] Smith SJ, Parveen S, Sass C, et al. An audit of dementia education and training in UK health  
41 and social care: a comparison with national benchmark standards. *BMC health services research*.  
42 2019 Dec 1;19(1):711.  
43
- 44 [23] Elvish R, Burrow S, Cawley R, et al. ‘Getting to Know Me’: The second phase roll-out of a  
45 staff training programme for supporting people with dementia in general hospitals. *Dementia*.  
46 2018 Jan;17(1):96-109.  
47  
48  
49  
50  
51  
52  
53  
54  
55  
56  
57  
58  
59  
60

- 1  
2 [24] O'Connor ML, McFadden SH. Development and psychometric validation of the Dementia  
3 Attitudes Scale. *International Journal of Alzheimer's Disease*. 2010;2010.  
4
- 5 [25] Tabachnick BG, Fidell LS, Ullman JB. Using multivariate statistics. Boston, MA: Pearson;  
6 2007 Mar 3.  
7
- 8 [26] Katz A. A council of elders: creating a multi-voiced dialogue in a community of  
9 care. *Social Science and Medicine*. 2000; 50: 851-860.  
10
- 11 [27] Mathie E, Wilson P, Poland F, McNeilly E, Howe A, Staniszewska S, Cowe M, Munday D,  
12 Goodman C. Consumer involvement in health research: a UK scoping and survey. *International*  
13 *Journal of Consumer Studies*, 2014; 1: 35-44.  
14
- 15 [28] Ocloo J, Matthews R. From tokenism to empowerment: progressing patient and public  
16 involvement in healthcare improvement. *BMJ Quality and Safety*. 2016: 8: 626-632.  
17
- 18 [29] Hunter, P.V., Hadjistavropoulos, T., Thorpe, L., Lix, L.M. and Malloy, D.C., 2016. The  
19 influence of individual and organizational factors on person-centred dementia care. *Aging &*  
20 *mental health*, 20(7), pp.700-708.  
21
- 22 [30] McCabe, M.P., Mellor, D., Karantzas, G., Von Treuer, K., Davison, T.E. and O'Connor, D.,  
23 2017. Organizational factors related to the confidence of workers in working with residents with  
24 dementia or depression in aged care facilities. *Aging & Mental Health*, 21(5), pp.487-493.  
25
- 26 [31] Hughes, J., Bagley, H., Reilly, S., Burns, A. and Challis, D., 2008. Care staff working with  
27 people with dementia: training, knowledge and confidence. *Dementia*, 7(2), pp.227-238.  
28
- 29 [32] Rivett, E., Hammond, L. and West, J., 2019. What influences self-perceived competence  
30 and confidence in dementia care home staff? A systematic review. *Psychogeriatrics*, 19(5),  
31 pp.440-456.  
32
- 33 [33] Mullan, M.A. and Sullivan, K.A., 2016. Positive attitudes and person-centred care predict of  
34 sense of competence in dementia care staff. *Aging & mental health*, 20(4), pp.407-414.  
35  
36  
37  
38  
39  
40  
41  
42  
43  
44  
45  
46  
47  
48  
49  
50  
51  
52  
53  
54  
55  
56  
57  
58  
59  
60

Table 1. Demographic characteristics of health and social care staff included in the study

| Characteristic | Sub Characteristic        | N   | Percentage |
|----------------|---------------------------|-----|------------|
| Gender         | Male                      | 63  | 11.39      |
|                | Female                    | 489 | 88.4       |
| Ethnicity      | White British             | 552 | 94.4       |
|                | Pakistani                 | 2   | 0.4        |
|                | Indian                    | 5   | 0.9        |
|                | Black African/Caribbean   | 6   | 1.1        |
|                | Mixed ethnicity           | 7   | 1.3        |
|                | Arab                      | 1   | 0.2        |
|                | Not stated                | 4   | 0.7        |
| Age            | 18-24 years               | 27  | 4.9        |
|                | 25-29 years               | 42  | 7.6        |
|                | 30-34 years               | 45  | 8.1        |
|                | 35-39 years               | 55  | 9.9        |
|                | 40-44 years               | 60  | 10.8       |
|                | 45-49 years               | 89  | 16.1       |
|                | 50-54 years               | 102 | 18.4       |
|                | 55-59 years               | 87  | 15.7       |
|                | 60-64 years               | 29  | 5.2        |
|                | 65 years and over         | 15  | 2.7        |
| Role           | Ancillary/clerical        | 39  | 7.1        |
|                | Unqualified clinical/care | 108 | 19.5       |
|                | Qualified clinical        | 194 | 35.1       |
|                | Unit/facility manager     | 26  | 4.7        |
|                | Senior manager            | 65  | 11.8       |
|                | Other                     | 121 | 21.9       |
| Time in role   | Less than 1 years         | 15  | 2.7        |
|                | 1-2 years                 | 45  | 8.1        |
|                | 3-4 years                 | 50  | 9          |
|                | 5-9 years                 | 94  | 17         |
|                | 10-19 years               | 141 | 25.5       |
|                | 20 and over years         | 197 | 35.6       |



Table 2. Summary of hierarchical regression to establish impact of staff characteristics, training content and pedagogical factors on staff confidence.

| <b>Variables</b>            | <b>B</b> | <b>SE</b> | <b>Beta<br/>(Standardised)</b> | <b>P value</b> |
|-----------------------------|----------|-----------|--------------------------------|----------------|
| Female                      | 1.588    | .974      | .068                           | .104           |
| Age                         | -.405    | .157      | -.124                          | .010           |
| Ethnicity (white British)   | -.068    | .195      | -.014                          | .729           |
| Less than 1 year experience | -3.991   | 1.965     | -.089                          | .043           |
| 1-2 years                   | -1.906   | 1.340     | -.071                          | .156           |
| 3-4 year                    | -2.027   | 1.270     | -.078                          | .111           |
| 5-9 years                   | -.533    | .999      | -.027                          | .594           |
| 10 plus years               | -.213    | .842      | -.012                          | .801           |
| Role: Ancillary             | -3.823   | 1.349     | -.133                          | .005           |
| Role: Clinical              | .852     | .934      | .045                           | .362           |
| Role: Manager               | 1.606    | 1.569     | .044                           | .307           |
| Role: Senior manager        | -.209    | 1.121     | -.009                          | .853           |
| Role: Other                 | -2.317   | .953      | -.127                          | .015           |
| Course length               | .012     | .029      | .021                           | .688           |
| Face to face learning       | 1.547    | 8.071     | .049                           | .848           |
| E learning                  | 4.581    | 4.626     | .144                           | .323           |
| Mentoring                   | 1.861    | 1.578     | .105                           | .239           |
| Simulation                  | 4.508    | 3.418     | .290                           | .188           |
| Completion: 1-2 years ago   | .416     | .714      | .026                           | .560           |
| More than 3 years ago       | -.442    | 1.350     | -.014                          | .743           |
| Number of courses           | .860     | .863      | .056                           | .319           |
| Number of learning outcomes | .015     | 1.165     | .001                           | .990           |
| Number of subjects          | .113     | .127      | .381                           | .371           |
| Tier                        | -1.617   | 2.326     | -.381                          | .487           |
| Awareness                   | -1.465   | 4.775     | -.099                          | .759           |
| Diagnosis                   | -.151    | 6.105     | -.010                          | .980           |
| Communication               | 4.147    | 7.355     | .153                           | .573           |
| Health and wellbeing        | .158     | 2.956     | .006                           | .957           |
| Living well with dementia   | -2.670   | 4.961     | -.101                          | .591           |
| Families                    | .437     | 7.181     | .028                           | .951           |
| Equality                    | -6.774   | 4.572     | -.289                          | .139           |
| Law                         | 5.218    | 8.768     | .131                           | .552           |
| Leadership                  | .972     | 2.726     | .048                           | .722           |

Table 3. Summary of hierarchical regression to establish impact of staff characteristics, training content and pedagogical factors on staff knowledge (attitude sub-scale).

| Variables                   | B       | SE    | Beta<br>(Standardised) | P value |
|-----------------------------|---------|-------|------------------------|---------|
| Female                      | 1.047   | .705  | .065                   | .138    |
| Age                         | -.236   | .114  | -.105                  | .038    |
| Ethnicity (white British)   | -.024   | .141  | -.007                  | .866    |
| Less than 1 year experience | -3.637  | 1.421 | -.117                  | .011    |
| 1-2 years                   | -2.010  | .970  | -.108                  | .039    |
| 3-4 year                    | -.871   | .919  | -.048                  | .344    |
| 5-9 years                   | -.337   | .723  | -.024                  | .641    |
| 10 plus years               | -1.008  | .609  | -.084                  | .099    |
| Role: Ancillary             | .926    | .976  | .047                   | .343    |
| Role: Clinical              | .556    | .675  | .042                   | .411    |
| Role: Manager               | 1.391   | 1.135 | .056                   | .221    |
| Role: Senior manager        | .121    | .811  | .008                   | .881    |
| Role: Other                 | -.701   | .690  | -.055                  | .310    |
| Course length               | -.014   | .021  | -.037                  | .505    |
| Face to face learning       | 12.535  | 5.837 | .570                   | .032    |
| E learning                  | 1.667   | 3.346 | .076                   | .619    |
| Mentoring                   | 3.293   | 1.141 | .269                   | .004    |
| Simulation                  | 12.247  | 2.472 | 1.139                  | .000    |
| Completion: 1-2 years ago   | -.587   | .517  | -.052                  | .257    |
| More than 3 years ago       | .353    | .976  | .017                   | .718    |
| Number of courses           | .869    | .624  | .082                   | .165    |
| Number of learning outcomes | -.131   | .842  | -.011                  | .876    |
| Number of subjects          | .115    | .092  | .558                   | .211    |
| Tier                        | -1.078  | 1.682 | -.367                  | .522    |
| Awareness                   | -8.951  | 3.454 | -.877                  | .010    |
| Diagnosis                   | 4.185   | 4.416 | .395                   | .344    |
| Communication               | 8.549   | 5.319 | .456                   | .109    |
| Health and wellbeing        | -2.785  | 2.138 | -.162                  | .193    |
| Living well with dementia   | -13.959 | 3.588 | -.761                  | .000    |
| Families                    | 3.542   | 5.194 | .332                   | .496    |
| Equality                    | -10.931 | 3.307 | -.675                  | .001    |
| Law                         | -2.710  | 6.342 | -.098                  | .669    |
| Leadership                  | 2.341   | 1.971 | .166                   | .236    |

Table 4. Summary of hierarchical regression to establish impact of staff characteristics, training content and pedagogical factors on staff knowledge.

| Variables                   | B      | SE    | Beta<br>(Standardised) | P value |
|-----------------------------|--------|-------|------------------------|---------|
| Female                      | .368   | .262  | .063                   | .161    |
| Age                         | -.125  | .042  | -.154                  | .003    |
| Ethnicity (white British)   | -.011  | .052  | -.009                  | .839    |
| Less than 1 year experience | -1.147 | .528  | -.102                  | .030    |
| 1-2 years                   | -1.272 | .360  | -.190                  | .000    |
| 3-4 year                    | -.174  | .341  | -.027                  | .610    |
| 5-9 years                   | -.472  | .269  | -.095                  | .079    |
| 10 plus years               | -.534  | .226  | -.124                  | .019    |
| Role: Ancillary             | .031   | .363  | .004                   | .932    |
| Role: Clinical              | .099   | .251  | .021                   | .692    |
| Role: Manager               | .391   | .422  | .043                   | .354    |
| Role: Senior manager        | .053   | .301  | .009                   | .860    |
| Role: Other                 | -.209  | .256  | -.046                  | .416    |
| Course length               | .002   | .008  | .016                   | .779    |
| Face to face learning       | -5.640 | 2.169 | -.712                  | .010    |
| E learning                  | 2.489  | 1.243 | .314                   | .046    |
| Mentoring                   | -.056  | .424  | -.013                  | .896    |
| Simulation                  | 3.461  | .919  | .893                   | .000    |
| Completion: 1-2 years ago   | -.118  | .192  | -.029                  | .540    |
| More than 3 years ago       | .567   | .363  | .074                   | .119    |
| Number of courses           | -.151  | .232  | -.040                  | .514    |
| Number of learning outcomes | .003   | .313  | .001                   | .991    |
| Number of subjects          | .071   | .034  | .956                   | .038    |
| Tier                        | -.984  | .625  | -.930                  | .116    |
| Awareness                   | -4.377 | 1.283 | -1.190                 | .001    |
| Diagnosis                   | 2.493  | 1.641 | .653                   | .129    |
| Communication               | -.510  | 1.977 | -.076                  | .796    |
| Health and wellbeing        | .651   | .794  | .105                   | .413    |
| Living well with dementia   | -4.510 | 1.333 | -.682                  | .001    |
| Families                    | 2.932  | 1.930 | .763                   | .129    |
| Equality                    | -2.896 | 1.229 | -.496                  | .019    |
| Law                         | -4.350 | 2.356 | -.438                  | .066    |
| Leadership                  | 1.205  | .733  | .237                   | .101    |

Table 5. Summary of hierarchical regression to establish impact of staff characteristics, training content and pedagogical factors on staff comfort (attitude sub-scale).

| <b>Variables</b>            | <b>B</b> | <b>SE</b> | <b>Beta<br/>(Standardised)</b> | <b>P value</b> |
|-----------------------------|----------|-----------|--------------------------------|----------------|
| Female                      | -.792    | .810      | -.045                          | .328           |
| Age                         | .017     | .130      | .007                           | .896           |
| Ethnicity (white British)   | .369     | .162      | .105                           | .023           |
| Less than 1 year experience | 1.368    | 1.632     | .040                           | .403           |
| 1-2 years                   | -.289    | 1.114     | -.014                          | .795           |
| 3-4 year                    | -.920    | 1.055     | -.047                          | .384           |
| 5-9 years                   | -.031    | .830      | -.002                          | .970           |
| 10 plus years               | -.572    | .700      | -.044                          | .414           |
| Role: Ancillary             | -.160    | 1.121     | -.007                          | .887           |
| Role: Clinical              | -.305    | .776      | -.021                          | .694           |
| Role: Manager               | -1.040   | 1.304     | -.038                          | .425           |
| Role: Senior manager        | -.544    | .932      | -.031                          | .560           |
| Role: Other                 | .822     | .792      | .060                           | .300           |
| Course length               | -.007    | .024      | -.016                          | .779           |
| Face to face learning       | -16.595  | 6.706     | -.693                          | .014           |
| E learning                  | -7.606   | 3.844     | -.317                          | .048           |
| Mentoring                   | 1.597    | 1.311     | .120                           | .224           |
| Simulation                  | -3.883   | 2.840     | -.331                          | .172           |
| Completion: 1-2 years ago   | .790     | .593      | .064                           | .184           |
| More than 3 years ago       | .000     | 1.122     | .000                           | 1.000          |
| Number of courses           | -1.111   | .717      | -.096                          | .122           |
| Number of learning outcomes | 2.333    | .968      | .186                           | .016           |
| Number of subjects          | -.165    | .105      | -.736                          | .118           |
| Tier                        | 2.107    | 1.932     | .659                           | .276           |
| Awareness                   | 10.642   | 3.968     | .957                           | .008           |
| Diagnosis                   | -4.585   | 5.073     | -.397                          | .367           |
| Communication               | 6.454    | 6.111     | .316                           | .291           |
| Health and wellbeing        | -3.009   | 2.456     | -.161                          | .221           |
| Living well with dementia   | 11.148   | 4.122     | .558                           | .007           |
| Families                    | -8.726   | 5.967     | -.751                          | .144           |
| Equality                    | .868     | 3.799     | .049                           | .819           |
| Law                         | 15.096   | 7.286     | .502                           | .039           |
| Leadership                  | -2.011   | 2.265     | -.131                          | .375           |

# Reporting checklist for cross sectional study.

Based on the STROBE cross sectional guidelines.

## Instructions to authors

Complete this checklist by entering the page numbers from your manuscript where readers will find each of the items listed below.

Your article may not currently address all the items on the checklist. Please modify your text to include the missing information. If you are certain that an item does not apply, please write "n/a" and provide a short explanation.

Upload your completed checklist as an extra file when you submit to a journal.

In your methods section, say that you used the STROBE cross sectional reporting guidelines, and cite them as:

von Elm E, Altman DG, Egger M, Pocock SJ, Gøtzsche PC, Vandenbroucke JP. The Strengthening the Reporting of Observational Studies in Epidemiology (STROBE) Statement: guidelines for reporting observational studies.

|                           | Reporting Item                                                                                                      | Page Number |
|---------------------------|---------------------------------------------------------------------------------------------------------------------|-------------|
| <b>Title and abstract</b> |                                                                                                                     |             |
| Title                     | <a href="#">#1a</a> Indicate the study's design with a commonly used term in the title or the abstract              | Page 1      |
| Abstract                  | <a href="#">#1b</a> Provide in the abstract an informative and balanced summary of what was done and what was found | Page 1      |
| <b>Introduction</b>       |                                                                                                                     |             |
| Background / rationale    | <a href="#">#2</a> Explain the scientific background and rationale for the investigation being reported             | Page 3      |
| Objectives                | <a href="#">#3</a> State specific objectives, including any prespecified hypotheses                                 | Page 5      |
| <b>Methods</b>            |                                                                                                                     |             |
| Study design              | <a href="#">#4</a> Present key elements of study design early in the                                                | Page 5      |

|    |                            |                      |                                                                                                                                                                                                                                                                      |        |
|----|----------------------------|----------------------|----------------------------------------------------------------------------------------------------------------------------------------------------------------------------------------------------------------------------------------------------------------------|--------|
| 1  |                            |                      | paper                                                                                                                                                                                                                                                                |        |
| 2  |                            |                      |                                                                                                                                                                                                                                                                      |        |
| 3  | Setting                    | <a href="#">#5</a>   | Describe the setting, locations, and relevant dates, including periods of recruitment, exposure, follow-up, and data collection                                                                                                                                      | Page 6 |
| 4  |                            |                      |                                                                                                                                                                                                                                                                      |        |
| 5  |                            |                      |                                                                                                                                                                                                                                                                      |        |
| 6  |                            |                      |                                                                                                                                                                                                                                                                      |        |
| 7  |                            |                      |                                                                                                                                                                                                                                                                      |        |
| 8  | Eligibility criteria       | <a href="#">#6a</a>  | Give the eligibility criteria, and the sources and methods of selection of participants.                                                                                                                                                                             | Page 6 |
| 9  |                            |                      |                                                                                                                                                                                                                                                                      |        |
| 10 |                            |                      |                                                                                                                                                                                                                                                                      |        |
| 11 |                            |                      |                                                                                                                                                                                                                                                                      |        |
| 12 |                            | <a href="#">#7</a>   | Clearly define all outcomes, exposures, predictors, potential confounders, and effect modifiers. Give diagnostic criteria, if applicable                                                                                                                             | Page 6 |
| 13 |                            |                      |                                                                                                                                                                                                                                                                      |        |
| 14 |                            |                      |                                                                                                                                                                                                                                                                      |        |
| 15 |                            |                      |                                                                                                                                                                                                                                                                      |        |
| 16 |                            |                      |                                                                                                                                                                                                                                                                      |        |
| 17 | Data sources / measurement | <a href="#">#8</a>   | For each variable of interest give sources of data and details of methods of assessment (measurement). Describe comparability of assessment methods if there is more than one group. Give information separately for for exposed and unexposed groups if applicable. | Page 6 |
| 18 |                            |                      |                                                                                                                                                                                                                                                                      |        |
| 19 |                            |                      |                                                                                                                                                                                                                                                                      |        |
| 20 |                            |                      |                                                                                                                                                                                                                                                                      |        |
| 21 |                            |                      |                                                                                                                                                                                                                                                                      |        |
| 22 |                            |                      |                                                                                                                                                                                                                                                                      |        |
| 23 |                            |                      |                                                                                                                                                                                                                                                                      |        |
| 24 |                            |                      |                                                                                                                                                                                                                                                                      |        |
| 25 |                            |                      |                                                                                                                                                                                                                                                                      |        |
| 26 |                            |                      |                                                                                                                                                                                                                                                                      |        |
| 27 | Bias                       | <a href="#">#9</a>   | Describe any efforts to address potential sources of bias                                                                                                                                                                                                            | Page 7 |
| 28 |                            |                      |                                                                                                                                                                                                                                                                      |        |
| 29 |                            |                      |                                                                                                                                                                                                                                                                      |        |
| 30 |                            |                      |                                                                                                                                                                                                                                                                      |        |
| 31 | Study size                 | <a href="#">#10</a>  | Explain how the study size was arrived at                                                                                                                                                                                                                            | Page 7 |
| 32 |                            |                      |                                                                                                                                                                                                                                                                      |        |
| 33 | Quantitative variables     | <a href="#">#11</a>  | Explain how quantitative variables were handled in the analyses. If applicable, describe which groupings were chosen, and why                                                                                                                                        | Page 7 |
| 34 |                            |                      |                                                                                                                                                                                                                                                                      |        |
| 35 |                            |                      |                                                                                                                                                                                                                                                                      |        |
| 36 |                            |                      |                                                                                                                                                                                                                                                                      |        |
| 37 |                            |                      |                                                                                                                                                                                                                                                                      |        |
| 38 | Statistical methods        | <a href="#">#12a</a> | Describe all statistical methods, including those used to control for confounding                                                                                                                                                                                    | Page 7 |
| 39 |                            |                      |                                                                                                                                                                                                                                                                      |        |
| 40 |                            |                      |                                                                                                                                                                                                                                                                      |        |
| 41 |                            |                      |                                                                                                                                                                                                                                                                      |        |
| 42 | Statistical methods        | <a href="#">#12b</a> | Describe any methods used to examine subgroups and interactions                                                                                                                                                                                                      | Page 7 |
| 43 |                            |                      |                                                                                                                                                                                                                                                                      |        |
| 44 |                            |                      |                                                                                                                                                                                                                                                                      |        |
| 45 |                            |                      |                                                                                                                                                                                                                                                                      |        |
| 46 | Statistical methods        | <a href="#">#12c</a> | Explain how missing data were addressed                                                                                                                                                                                                                              | Page 7 |
| 47 |                            |                      |                                                                                                                                                                                                                                                                      |        |
| 48 |                            |                      |                                                                                                                                                                                                                                                                      |        |
| 49 | Statistical methods        | <a href="#">#12d</a> | If applicable, describe analytical methods taking account of sampling strategy                                                                                                                                                                                       | NA     |
| 50 |                            |                      |                                                                                                                                                                                                                                                                      |        |
| 51 |                            |                      |                                                                                                                                                                                                                                                                      |        |
| 52 |                            |                      |                                                                                                                                                                                                                                                                      |        |
| 53 | Statistical methods        | <a href="#">#12e</a> | Describe any sensitivity analyses                                                                                                                                                                                                                                    | NA     |
| 54 |                            |                      |                                                                                                                                                                                                                                                                      |        |
| 55 |                            |                      |                                                                                                                                                                                                                                                                      |        |
| 56 |                            |                      |                                                                                                                                                                                                                                                                      |        |
| 57 | <b>Results</b>             |                      |                                                                                                                                                                                                                                                                      |        |
| 58 |                            |                      |                                                                                                                                                                                                                                                                      |        |
| 59 |                            |                      |                                                                                                                                                                                                                                                                      |        |
| 60 |                            |                      |                                                                                                                                                                                                                                                                      |        |

|    |                  |                      |                                                                                                                                                                                                                                                                                |                                                                 |
|----|------------------|----------------------|--------------------------------------------------------------------------------------------------------------------------------------------------------------------------------------------------------------------------------------------------------------------------------|-----------------------------------------------------------------|
| 1  | Participants     | <a href="#">#13a</a> | Report numbers of individuals at each stage of study—eg numbers potentially eligible, examined for eligibility, confirmed eligible, included in the study, completing follow-up, and analysed. Give information separately for for exposed and unexposed groups if applicable. |                                                                 |
| 2  |                  |                      |                                                                                                                                                                                                                                                                                |                                                                 |
| 3  |                  |                      |                                                                                                                                                                                                                                                                                |                                                                 |
| 4  |                  |                      |                                                                                                                                                                                                                                                                                |                                                                 |
| 5  |                  |                      |                                                                                                                                                                                                                                                                                |                                                                 |
| 6  |                  |                      |                                                                                                                                                                                                                                                                                |                                                                 |
| 7  |                  |                      |                                                                                                                                                                                                                                                                                |                                                                 |
| 8  |                  |                      |                                                                                                                                                                                                                                                                                |                                                                 |
| 9  |                  |                      |                                                                                                                                                                                                                                                                                |                                                                 |
| 10 | Participants     | <a href="#">#13b</a> | Give reasons for non-participation at each stage                                                                                                                                                                                                                               | NA                                                              |
| 11 |                  |                      |                                                                                                                                                                                                                                                                                |                                                                 |
| 12 |                  |                      |                                                                                                                                                                                                                                                                                |                                                                 |
| 13 |                  |                      |                                                                                                                                                                                                                                                                                | Reasons for non                                                 |
| 14 |                  |                      |                                                                                                                                                                                                                                                                                | participation were                                              |
| 15 |                  |                      |                                                                                                                                                                                                                                                                                | not collected                                                   |
| 16 |                  |                      |                                                                                                                                                                                                                                                                                |                                                                 |
| 17 |                  |                      |                                                                                                                                                                                                                                                                                |                                                                 |
| 18 | Participants     | <a href="#">#13c</a> | Consider use of a flow diagram                                                                                                                                                                                                                                                 | NA                                                              |
| 19 |                  |                      |                                                                                                                                                                                                                                                                                |                                                                 |
| 20 |                  |                      |                                                                                                                                                                                                                                                                                |                                                                 |
| 21 | Descriptive data | <a href="#">#14a</a> | Give characteristics of study participants (eg demographic, clinical, social) and information on exposures and potential confounders. Give information separately for exposed and unexposed groups if applicable.                                                              | Page 9                                                          |
| 22 |                  |                      |                                                                                                                                                                                                                                                                                |                                                                 |
| 23 |                  |                      |                                                                                                                                                                                                                                                                                |                                                                 |
| 24 |                  |                      |                                                                                                                                                                                                                                                                                |                                                                 |
| 25 |                  |                      |                                                                                                                                                                                                                                                                                |                                                                 |
| 26 |                  |                      |                                                                                                                                                                                                                                                                                |                                                                 |
| 27 |                  |                      |                                                                                                                                                                                                                                                                                |                                                                 |
| 28 |                  |                      |                                                                                                                                                                                                                                                                                |                                                                 |
| 29 | Descriptive data | <a href="#">#14b</a> | Indicate number of participants with missing data for each variable of interest                                                                                                                                                                                                | Number of participants included in all analysis Page 10 onwards |
| 30 |                  |                      |                                                                                                                                                                                                                                                                                |                                                                 |
| 31 |                  |                      |                                                                                                                                                                                                                                                                                |                                                                 |
| 32 |                  |                      |                                                                                                                                                                                                                                                                                |                                                                 |
| 33 |                  |                      |                                                                                                                                                                                                                                                                                |                                                                 |
| 34 |                  |                      |                                                                                                                                                                                                                                                                                |                                                                 |
| 35 |                  |                      |                                                                                                                                                                                                                                                                                |                                                                 |
| 36 |                  |                      |                                                                                                                                                                                                                                                                                |                                                                 |
| 37 | Outcome data     | <a href="#">#15</a>  | Report numbers of outcome events or summary measures. Give information separately for exposed and unexposed groups if applicable.                                                                                                                                              | Page 10                                                         |
| 38 |                  |                      |                                                                                                                                                                                                                                                                                |                                                                 |
| 39 |                  |                      |                                                                                                                                                                                                                                                                                |                                                                 |
| 40 |                  |                      |                                                                                                                                                                                                                                                                                |                                                                 |
| 41 |                  |                      |                                                                                                                                                                                                                                                                                |                                                                 |
| 42 |                  |                      |                                                                                                                                                                                                                                                                                |                                                                 |
| 43 | Main results     | <a href="#">#16a</a> | Give unadjusted estimates and, if applicable, confounder-adjusted estimates and their precision (eg, 95% confidence interval). Make clear which confounders were adjusted for and why they were included                                                                       | Page 10                                                         |
| 44 |                  |                      |                                                                                                                                                                                                                                                                                |                                                                 |
| 45 |                  |                      |                                                                                                                                                                                                                                                                                |                                                                 |
| 46 |                  |                      |                                                                                                                                                                                                                                                                                |                                                                 |
| 47 |                  |                      |                                                                                                                                                                                                                                                                                |                                                                 |
| 48 |                  |                      |                                                                                                                                                                                                                                                                                |                                                                 |
| 49 |                  |                      |                                                                                                                                                                                                                                                                                |                                                                 |
| 50 |                  |                      |                                                                                                                                                                                                                                                                                |                                                                 |
| 51 | Main results     | <a href="#">#16b</a> | Report category boundaries when continuous variables were categorized                                                                                                                                                                                                          | Page 8/9/10                                                     |
| 52 |                  |                      |                                                                                                                                                                                                                                                                                |                                                                 |
| 53 |                  |                      |                                                                                                                                                                                                                                                                                |                                                                 |
| 54 |                  |                      |                                                                                                                                                                                                                                                                                |                                                                 |
| 55 | Main results     | <a href="#">#16c</a> | If relevant, consider translating estimates of relative risk into absolute risk for a meaningful time period                                                                                                                                                                   | NA                                                              |
| 56 |                  |                      |                                                                                                                                                                                                                                                                                |                                                                 |
| 57 |                  |                      |                                                                                                                                                                                                                                                                                |                                                                 |
| 58 |                  |                      |                                                                                                                                                                                                                                                                                |                                                                 |
| 59 | Other analyses   | <a href="#">#17</a>  | Report other analyses done—e.g., analyses of                                                                                                                                                                                                                                   | NA                                                              |
| 60 |                  |                      |                                                                                                                                                                                                                                                                                |                                                                 |

subgroups and interactions, and sensitivity analyses

## Discussion

|                          |                     |                                                                                                                                                                  |         |
|--------------------------|---------------------|------------------------------------------------------------------------------------------------------------------------------------------------------------------|---------|
| Key results              | <a href="#">#18</a> | Summarise key results with reference to study objectives                                                                                                         | Page 11 |
| Limitations              | <a href="#">#19</a> | Discuss limitations of the study, taking into account sources of potential bias or imprecision. Discuss both direction and magnitude of any potential bias.      | Page 13 |
| Interpretation           | <a href="#">#20</a> | Give a cautious overall interpretation considering objectives, limitations, multiplicity of analyses, results from similar studies, and other relevant evidence. | Page 13 |
| Generalisability         | <a href="#">#21</a> | Discuss the generalisability (external validity) of the study results                                                                                            | Page 13 |
| <b>Other Information</b> |                     |                                                                                                                                                                  |         |
| Funding                  | <a href="#">#22</a> | Give the source of funding and the role of the funders for the present study and, if applicable, for the original study on which the present article is based    | Page 1  |

None The STROBE checklist is distributed under the terms of the Creative Commons Attribution License CC-BY. This checklist can be completed online using <https://www.goodreports.org/>, a tool made by the [EQUATOR Network](#) in collaboration with [Penelope.ai](#)
